# Supplementary material for: Regioselective Brønsted acid catalyzed ring opening of aziridines by phenols and thiophenols; a gateway to access functionalized indolines, indoles, benzothiazines, dihydrobenzo-thiazines, benzo-oxazines and benzochromenes
Source: Royal Society of Chemistry journal article supplement (doi:10.1039/d4ob00196f), 2024-01-01

## **Regioselective Brønsted Acid Catalyzed Ring Opening of Aziridines by Phenols and Thiophenols; A Gateway to Access Functionalized Indolines, Indoles, Benzothiazines, Dihydrobenzo-thiazines, Benzo-oxazines and Benzochromenes**

Arnab Roy,<sup>a</sup> Surajit Duari,<sup>a</sup> Srabani Maity,<sup>a</sup> Subrata Biswas,<sup>a</sup> Abhishek Kumar Mishra,<sup>b</sup> Srijit Biswas<sup>a,\*</sup>

<sup>a</sup>Department of Chemistry, University of Calcutta, 92, A. P. C. Road, Kolkata – 700 009, West Bengal, India

E-mail: sbchem@caluniv.ac.in; [srijit\\_biswas@yahoo.co.in](mailto:srijit_biswas@yahoo.co.in).

<sup>b</sup>Department of Medicinal and Process Chemistry, CSIR-Central Drug Research Institute, Lucknow – 226031, U. P. India

## Table of contents

| Contents                                                                                   | Page (s) |
|--------------------------------------------------------------------------------------------|----------|
| 1. Aziridines used in study                                                                | S3       |
| 2. Nucleophiles used in study                                                              | S3       |
| 3. X-ray crystallography                                                                   | S3 – S5  |
| 4. References                                                                              | S5       |
| 5. Copies of $^1\text{H}$ and $^{13}\text{C}$ { $^1\text{H}$ } NMR spectra of all products | S6 – S39 |

## 1. Aziridines used in study:

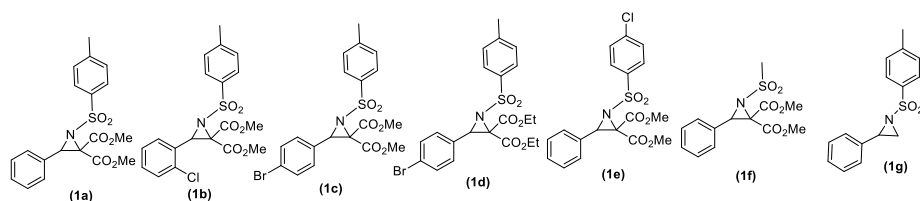

## 2. Nucleophiles used in study:

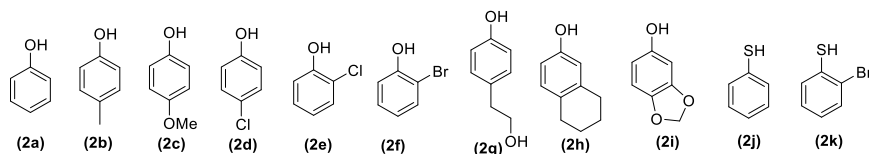

## 3. X-ray crystallography:

### Method for crystal growth:

80 mg of solid compound (**3i**), was dissolved in 1 mL of ethyl acetate, and diluted with equal amount of n-hexane in a 25 mL conical flask. Then the mixture was kept at 10 °C for one week inside a fridge. After slow evaporation of the solvent the desired crystals were formed.

Single-crystal X-ray data of compound **3i** was collected on a Bruker SMART Apex-II CCD diffractometer in the presence of graphite-monochromated Mo K $\alpha$  radiation ( $\lambda = 0.71073 \text{ \AA}$ ) at room temperature. The Bruker Apex-II suite program was used to perform data processing, structure solution, and refinement. Reflections available in  $2\theta_{\text{max}}$  range were harvested and corrected for Lorentz and polarization factors with Bruker SAINT plus.<sup>1</sup> Reflections were then corrected for absorption, interframe scaling, and other systematic errors with SADABS.<sup>2</sup> The structures were solved using direct methods and refined by means of full-matrix least-squares techniques based on  $F^2$  with SHELX2017/1 software package.<sup>3</sup> Non-hydrogen atoms present in the structures were refined with anisotropic thermal parameters. C–H hydrogen atoms were introduced at geometrical positions with  $U_{\text{iso}} = 1/2U_{\text{eq}}$  to those of the atoms to which they are attached.

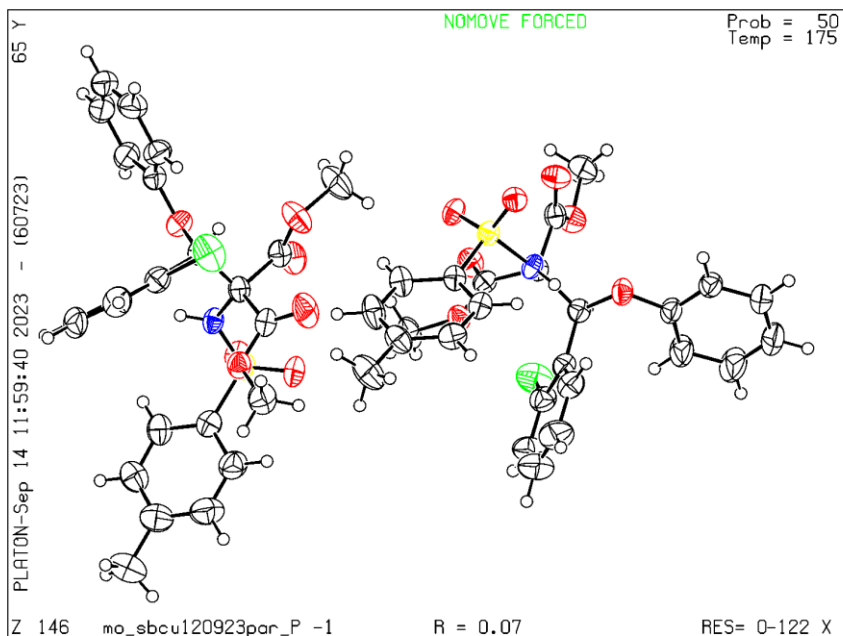

**Table 1 Crystal data and structure refinement for 3i.**

|                                                |                                                                    |
|------------------------------------------------|--------------------------------------------------------------------|
| Identification code                            | 3i                                                                 |
| Empirical formula                              | $C_{25}H_{24}ClNO_7S$                                              |
| Formula weight                                 | 517.96                                                             |
| Temperature/K                                  | 175.06                                                             |
| Crystal system                                 | triclinic                                                          |
| Space group                                    | P-1                                                                |
| a/Å                                            | 12.317(3)                                                          |
| b/Å                                            | 12.681(3)                                                          |
| c/Å                                            | 18.882(4)                                                          |
| $\alpha/^\circ$                                | 97.653(6)                                                          |
| $\beta/^\circ$                                 | 104.022(7)                                                         |
| $\gamma/^\circ$                                | 92.139(7)                                                          |
| Volume/Å <sup>3</sup>                          | 2828.2(10)                                                         |
| Z                                              | 4                                                                  |
| $\rho_{\text{calc}}/\text{cm}^3$               | 1.216                                                              |
| $\mu/\text{mm}^{-1}$                           | 0.249                                                              |
| F(000)                                         | 1080.0                                                             |
| Crystal size/mm <sup>3</sup>                   | 0.16 × 0.12 × 0.05                                                 |
| Radiation                                      | MoK $\alpha$ ( $\lambda = 0.71073$ )                               |
| 2 $\theta$ range for data collection/ $^\circ$ | 4.496 to 55.272                                                    |
| Index ranges                                   | $-16 \leq h \leq 15$ , $-16 \leq k \leq 16$ , $-24 \leq l \leq 22$ |
| Reflections collected                          | 34652                                                              |
| Independent reflections                        | 12860 [ $R_{\text{int}} = 0.1068$ , $R_{\text{sigma}} = 0.1360$ ]  |
| Data/restraints/parameters                     | 12860/0/638                                                        |
| Goodness-of-fit on $F^2$                       | 0.984                                                              |
| Final R indexes [ $I \geq 2\sigma(I)$ ]        | $R_1 = 0.0673$ , $wR_2 = 0.1618$                                   |

Final R indexes [all data]  $R_1 = 0.1467$ ,  $wR_2 = 0.2138$   
Largest diff. peak/hole /  $e \text{ \AA}^{-3}$  0.43/-0.43  
CCDC Number 2307104

#### 4. References:

- (1) G. M. Sheldrick, *SAINT, Ver. 6.02 and SADABS, Ver. 2.03*, Bruker AXS Inc.: Madison, WI, 2002.
- (2) G. M. Sheldrick, *SADABS, software for empirical absorption correction*, Universitat: Göttingen, Germany, **1999**.
- (3) G. M. Sheldrick, *SHELXS-2013 and SHELXL-2013, Program for Refinement of Crystal Structures; University of Göttingen: Göttingen, Germany, 2013*.

## 5. Copies of $^1\text{H}$ and $^{13}\text{C}$ $\{^1\text{H}\}$ NMR spectra of all products

### $^1\text{H}$ NMR spectra of 3a (400 MHz, Chloroform-*d*):

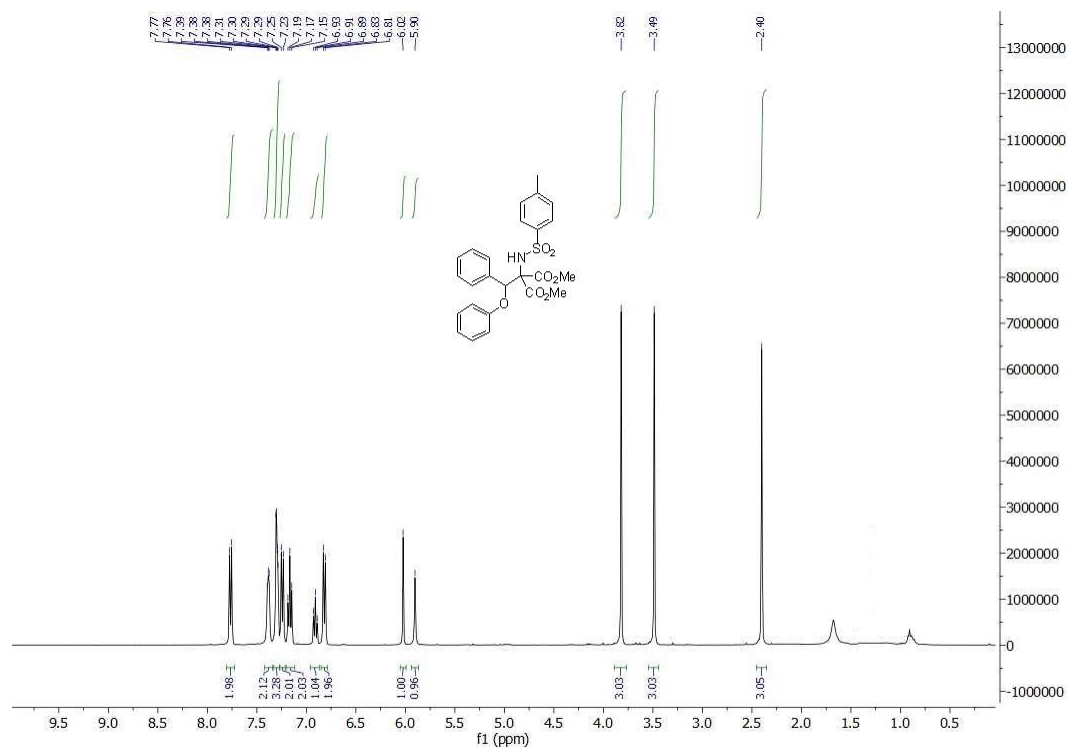

### $^{13}\text{C}$ $\{^1\text{H}\}$ NMR spectra of 3a (100 MHz, Chloroform-*d*):

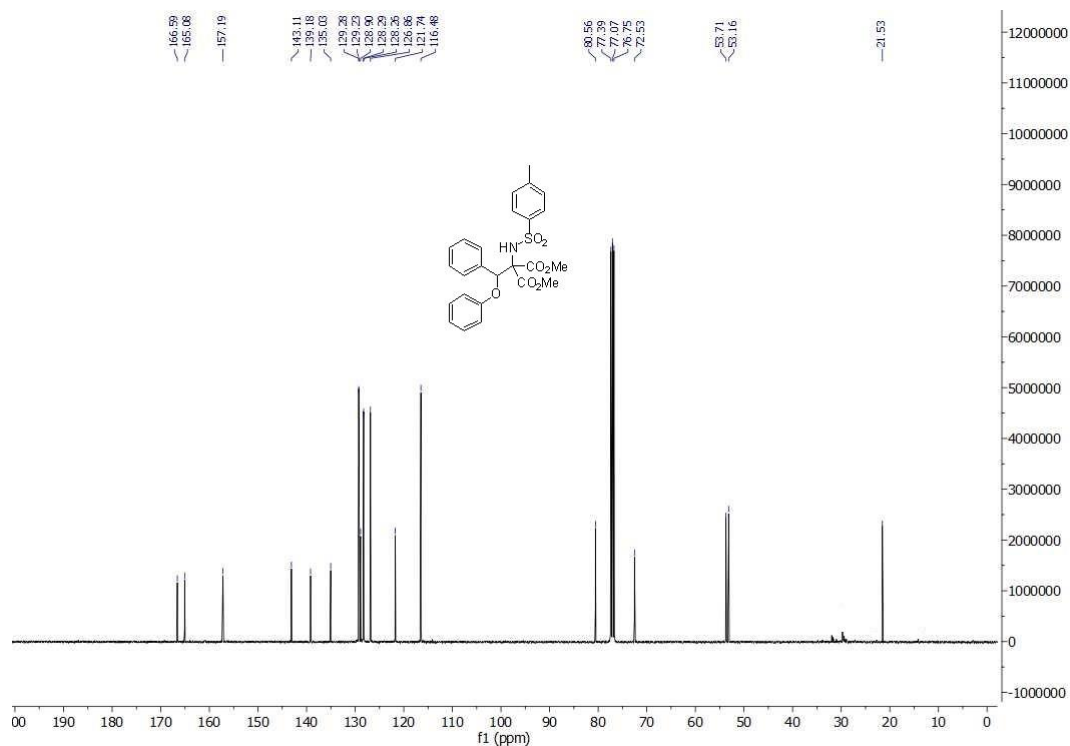

**<sup>1</sup>H NMR spectra of 3b (300 MHz, Chloroform-d):**

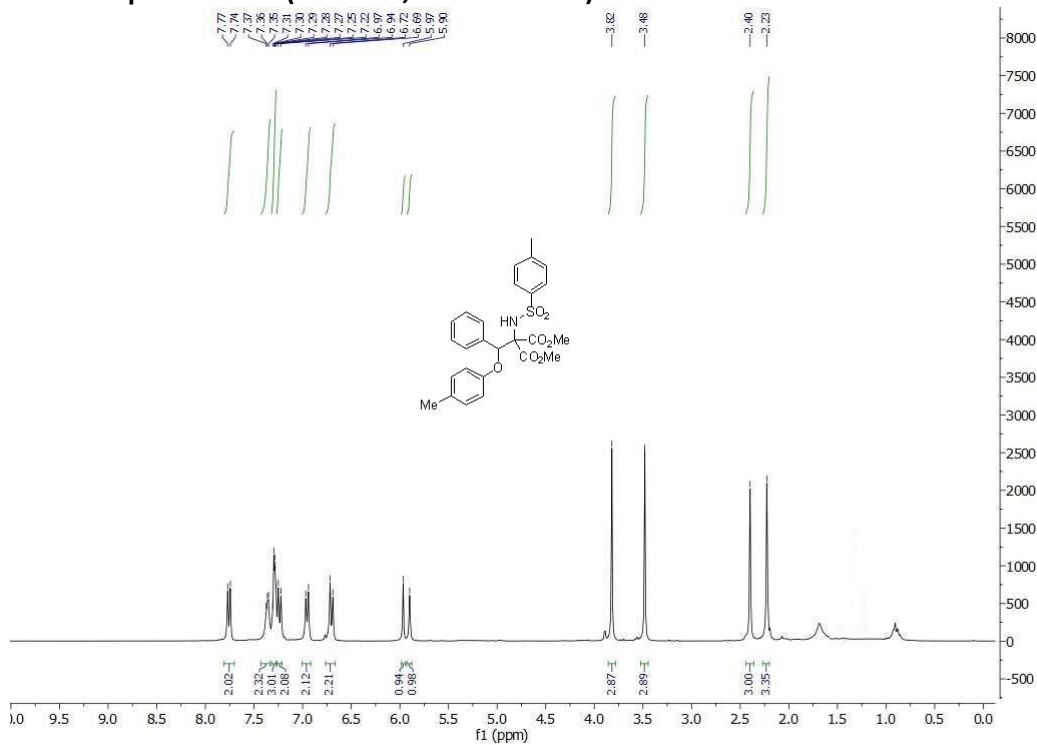

**<sup>13</sup>C {<sup>1</sup>H} NMR spectra of 3b (75 MHz, Chloroform-d):**

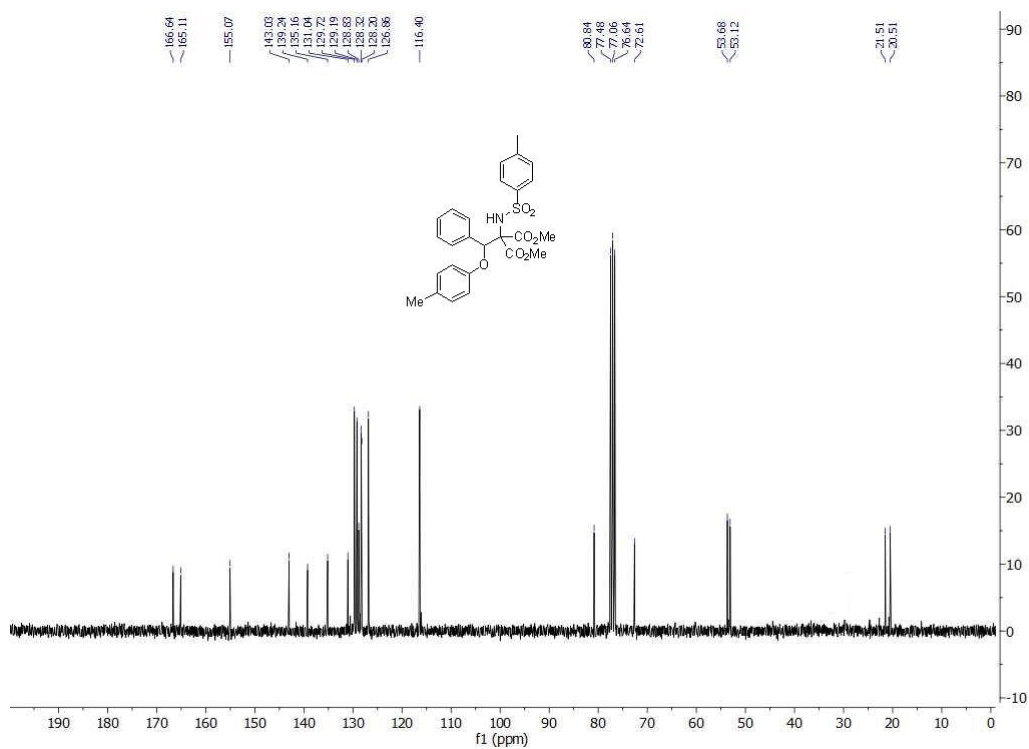

**<sup>1</sup>H NMR spectra of 3c (300 MHz, Chloroform-d):**

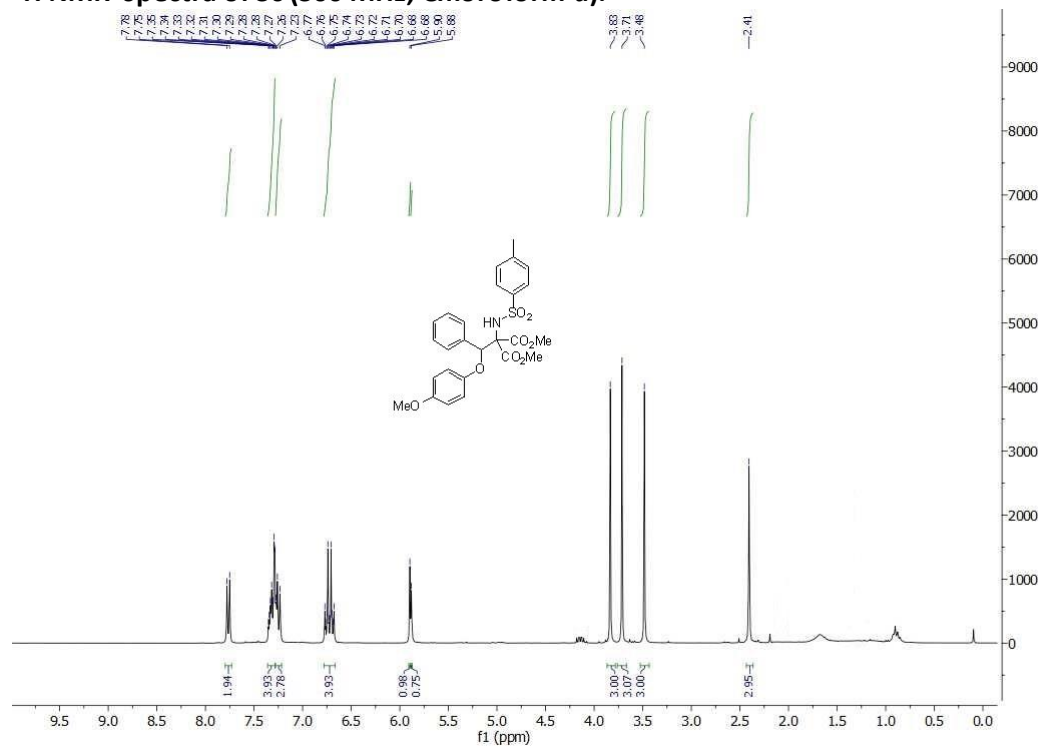

**<sup>13</sup>C {<sup>1</sup>H} NMR spectra of 3c (75 MHz, Chloroform-d):**

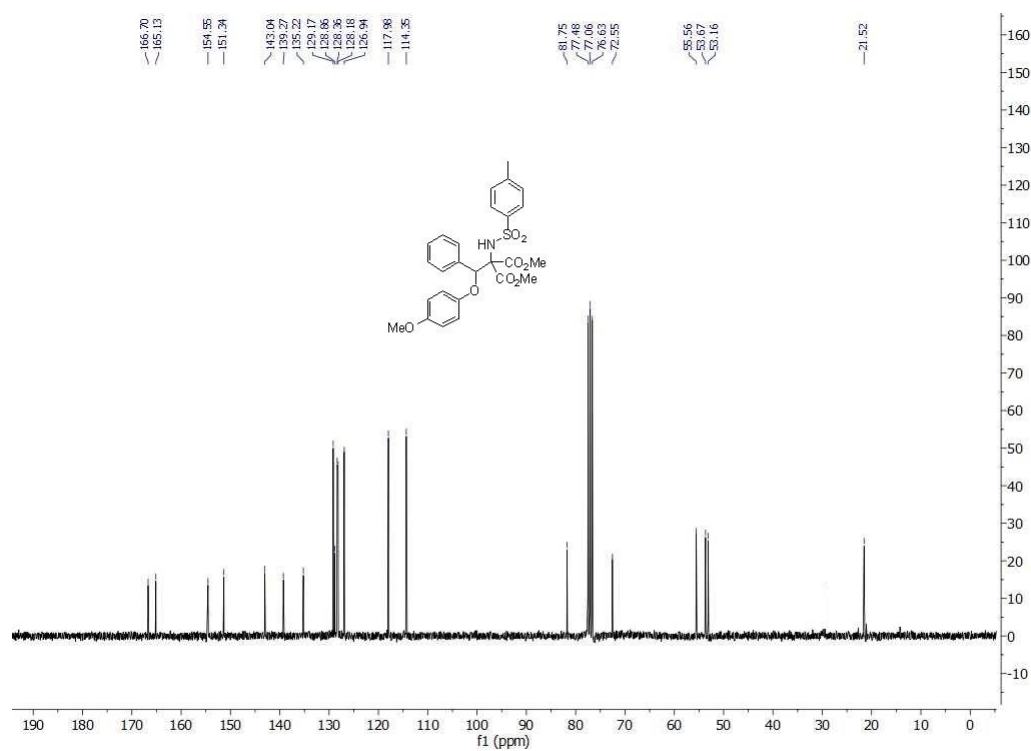



**<sup>1</sup>H NMR spectra of 3d (300 MHz, Chloroform-d):**

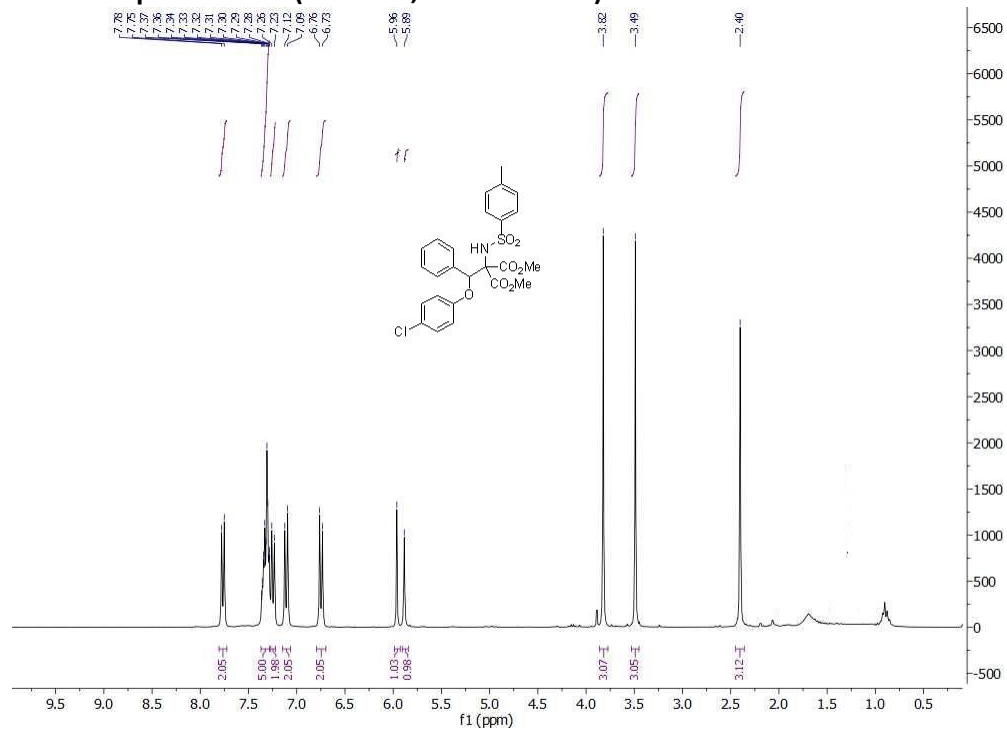

**<sup>13</sup>C {<sup>1</sup>H} NMR spectra of 3d (75 MHz, Chloroform-d):**

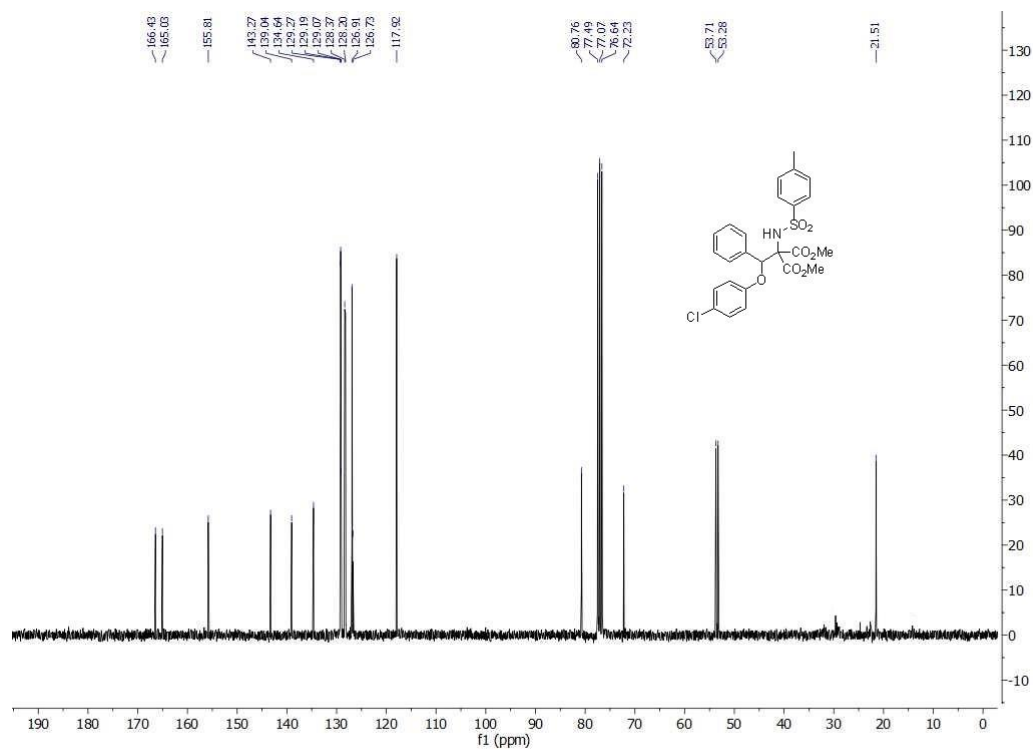

**<sup>1</sup>H NMR spectra of 3e (400 MHz, Chloroform-d):**

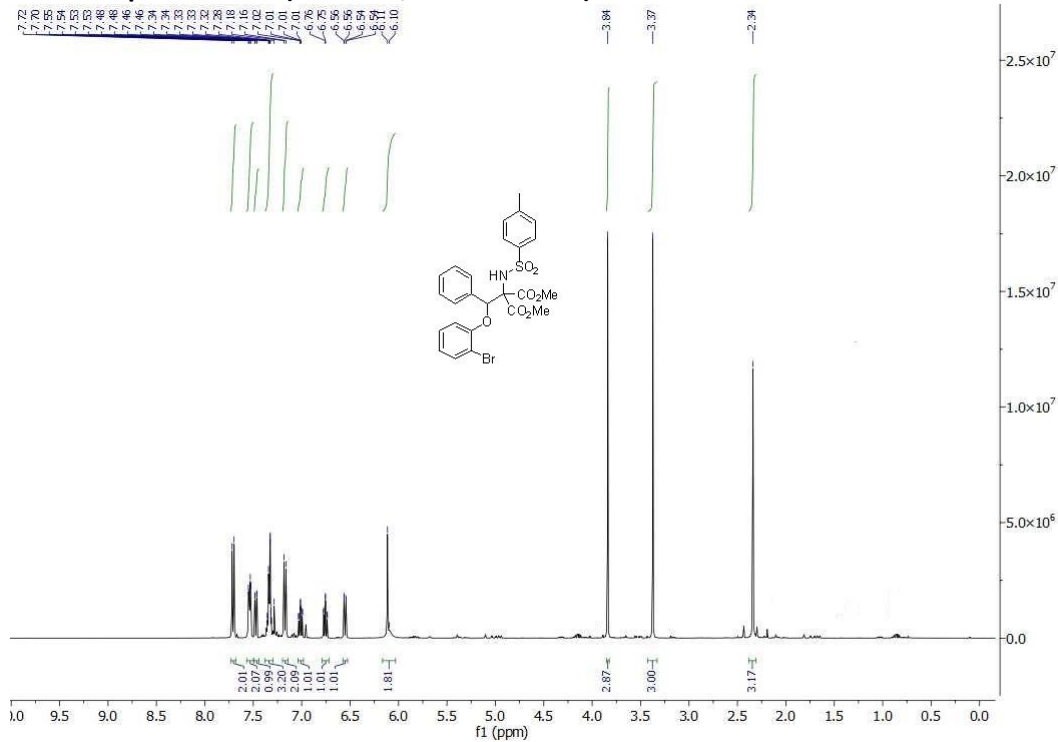

**<sup>13</sup>C {<sup>1</sup>H} NMR spectra of 3e (100 MHz, Chloroform-d):**

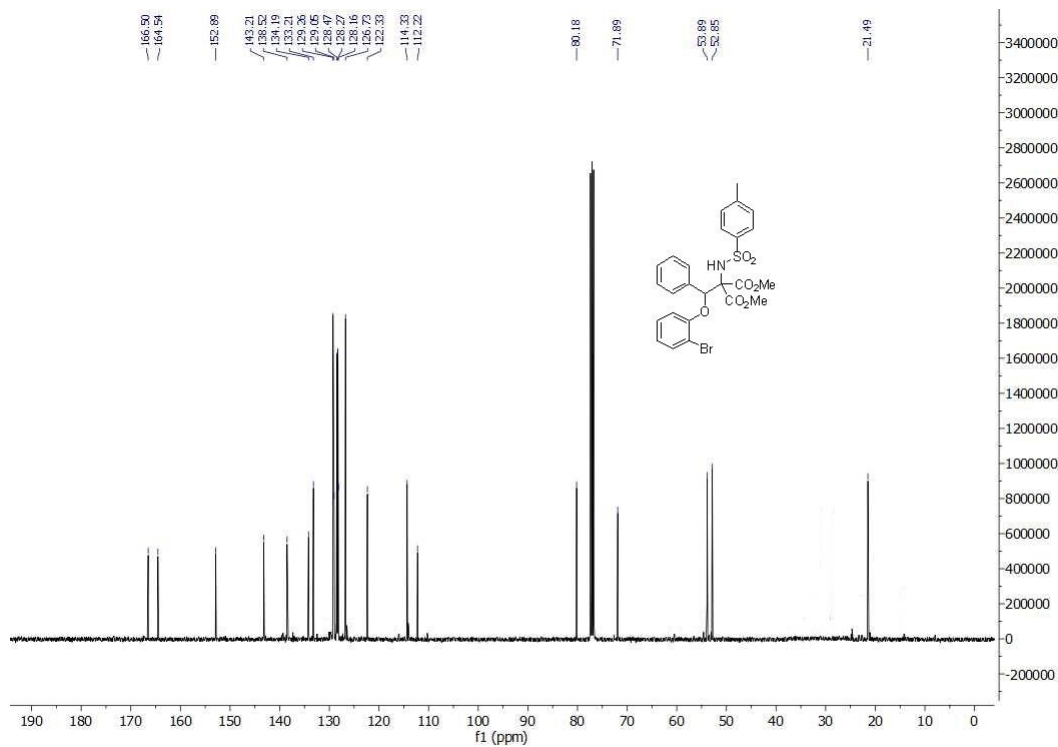

**<sup>1</sup>H NMR spectra of 3f (400 MHz, Chloroform-d):**

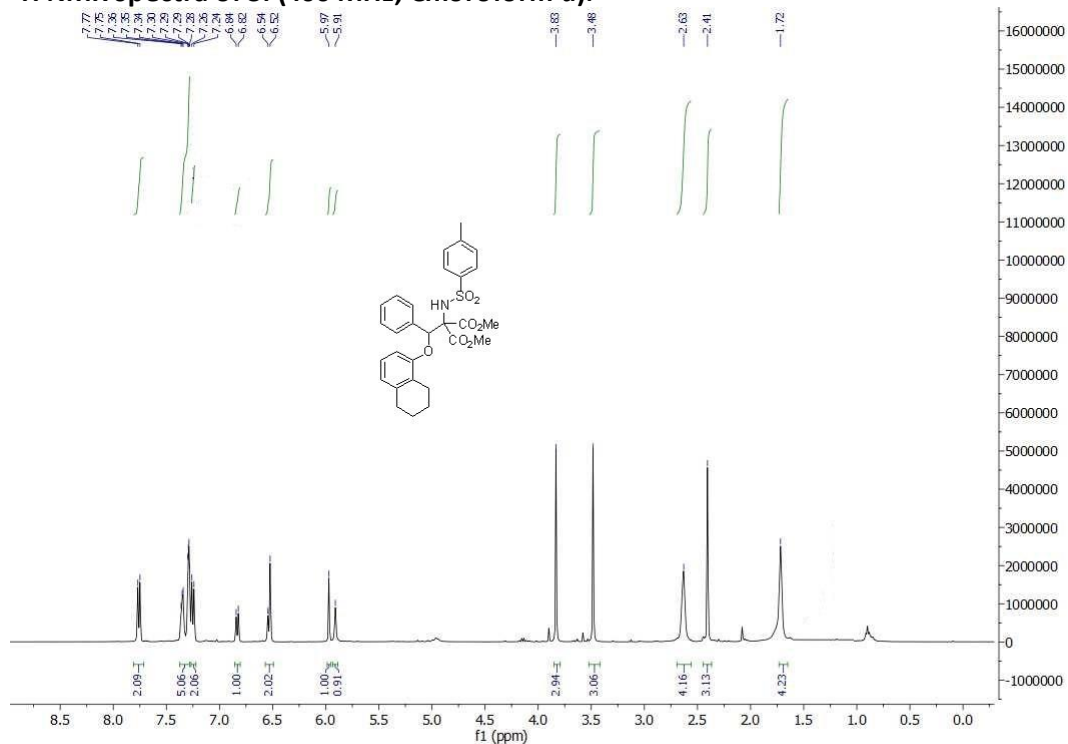

**<sup>13</sup>C {<sup>1</sup>H} NMR spectra of 3f (100 MHz, Chloroform-d):**

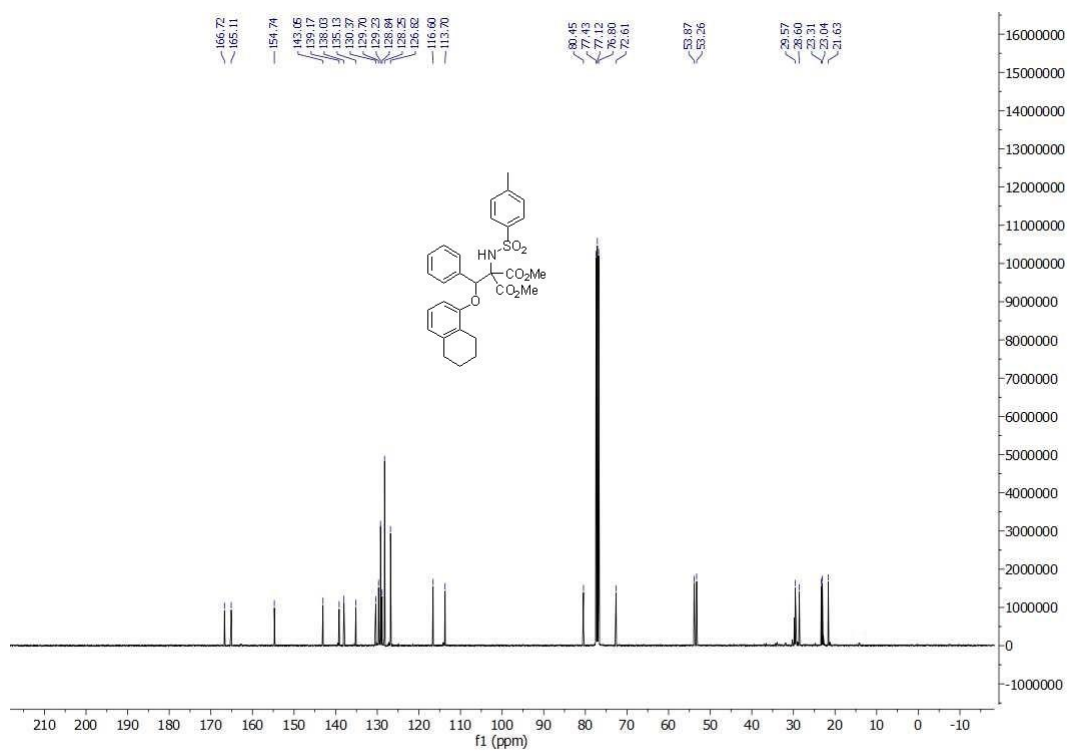

**<sup>1</sup>H NMR spectra of 3g (300 MHz, Chloroform-d):**

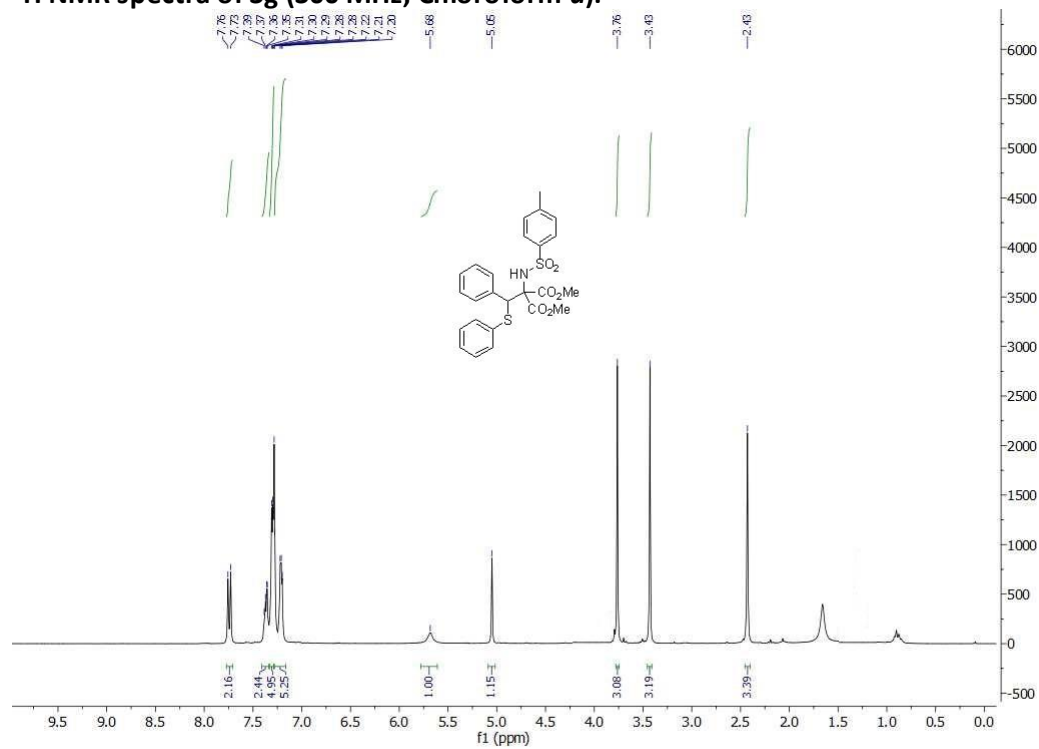

**<sup>13</sup>C {<sup>1</sup>H} NMR spectra of 3g (75 MHz, Chloroform-d):**

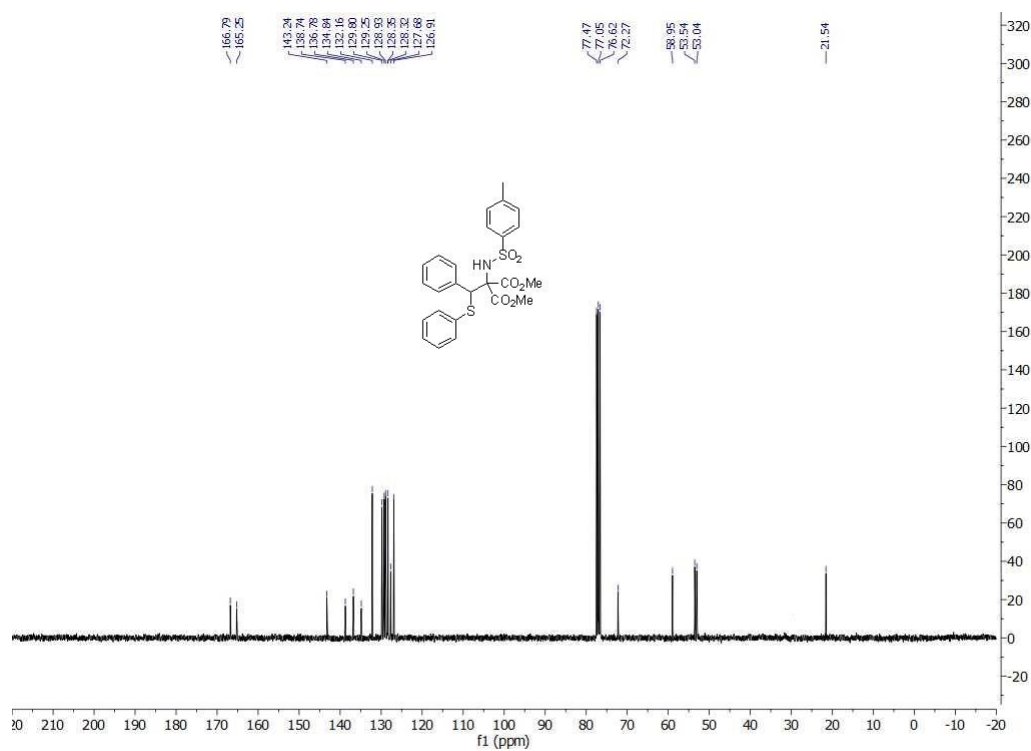

**<sup>1</sup>H NMR spectra of 3h (300 MHz, Chloroform-d):**

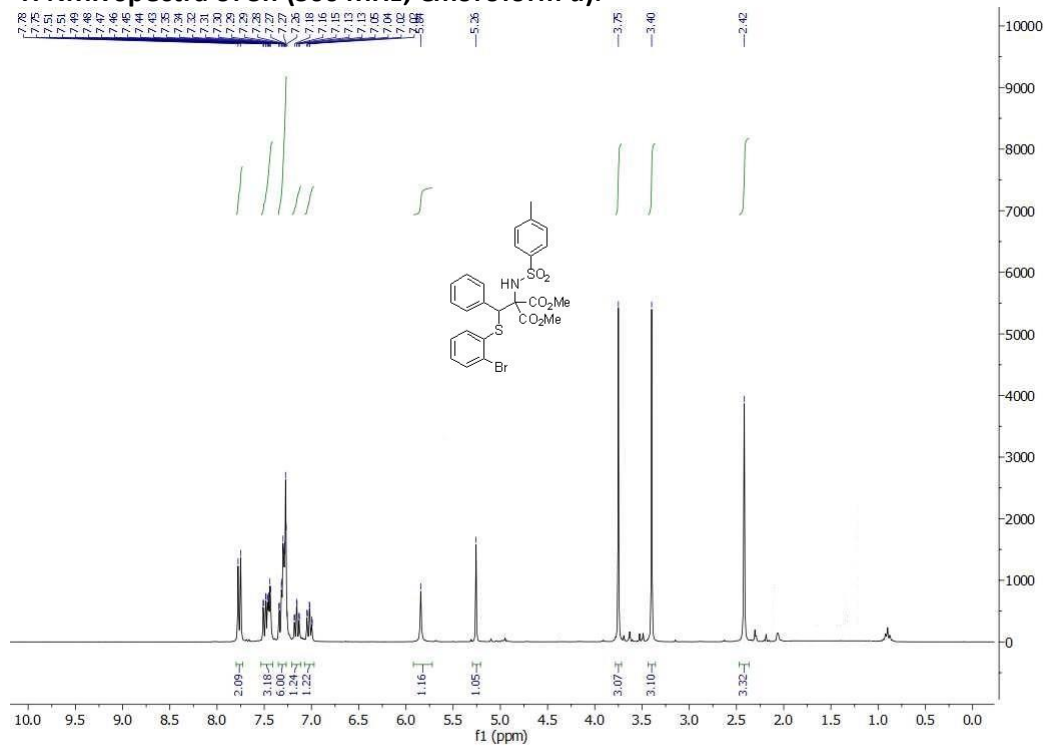

**<sup>13</sup>C {<sup>1</sup>H} NMR spectra of 3h (75 MHz, Chloroform-d):**

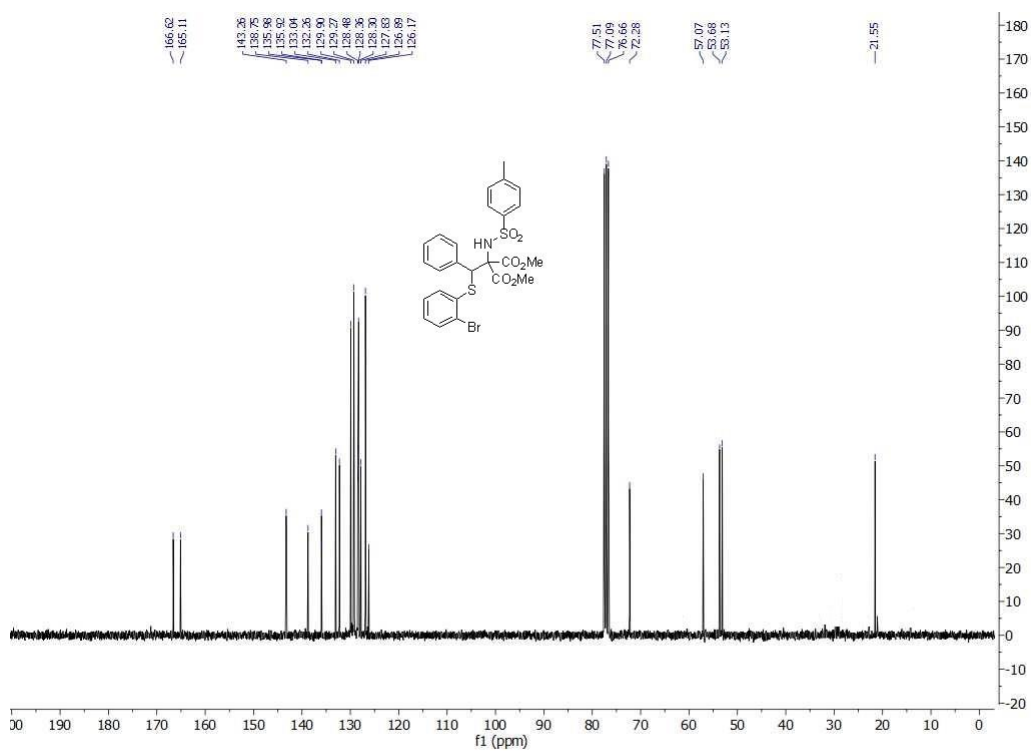

**<sup>1</sup>H NMR spectra of 3i (400 MHz, Chloroform-d):**

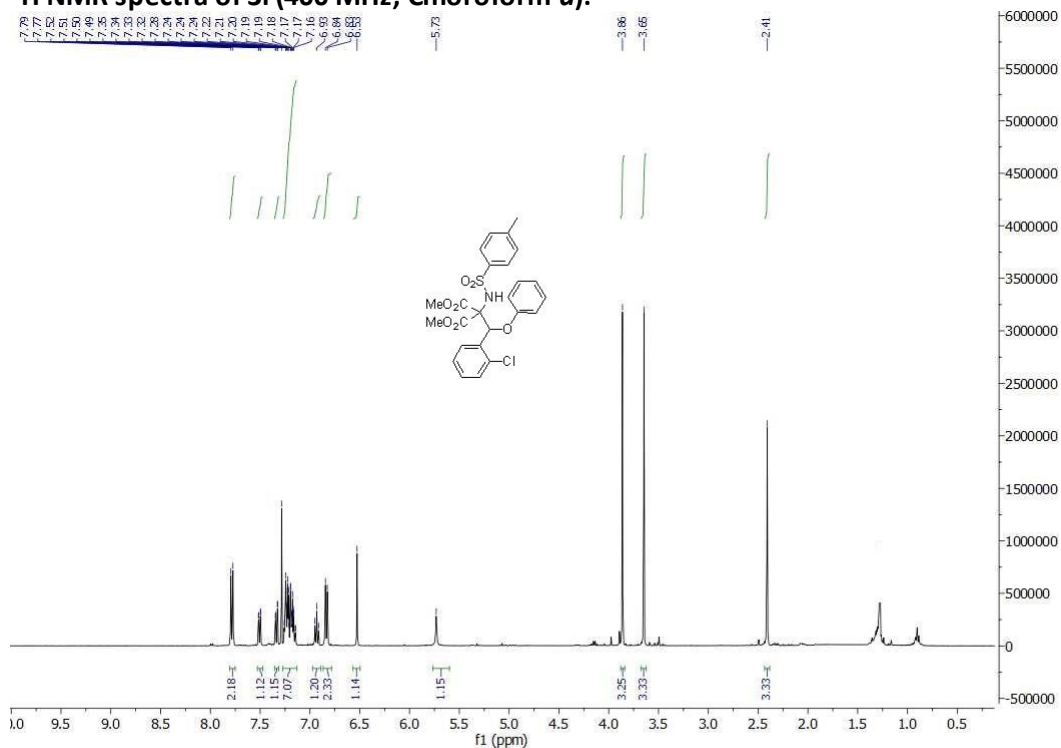

**<sup>13</sup>C {<sup>1</sup>H} NMR spectra of 3i (75 MHz, Chloroform-d):**

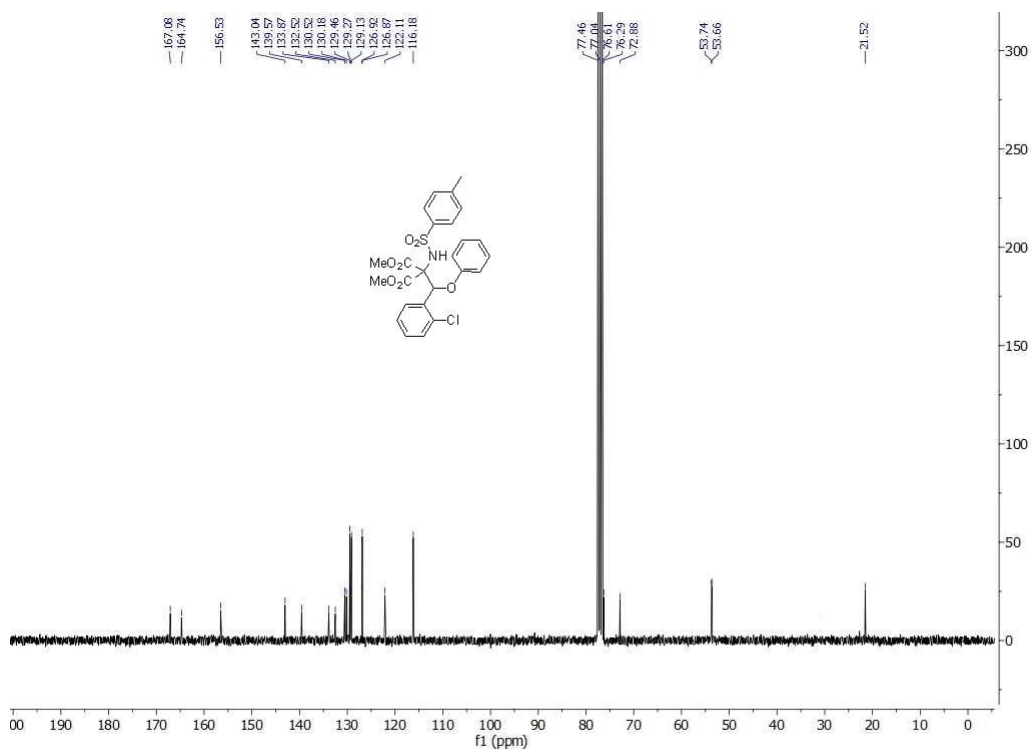

**<sup>1</sup>H NMR spectra of 3j (300 MHz, Chloroform-d):**

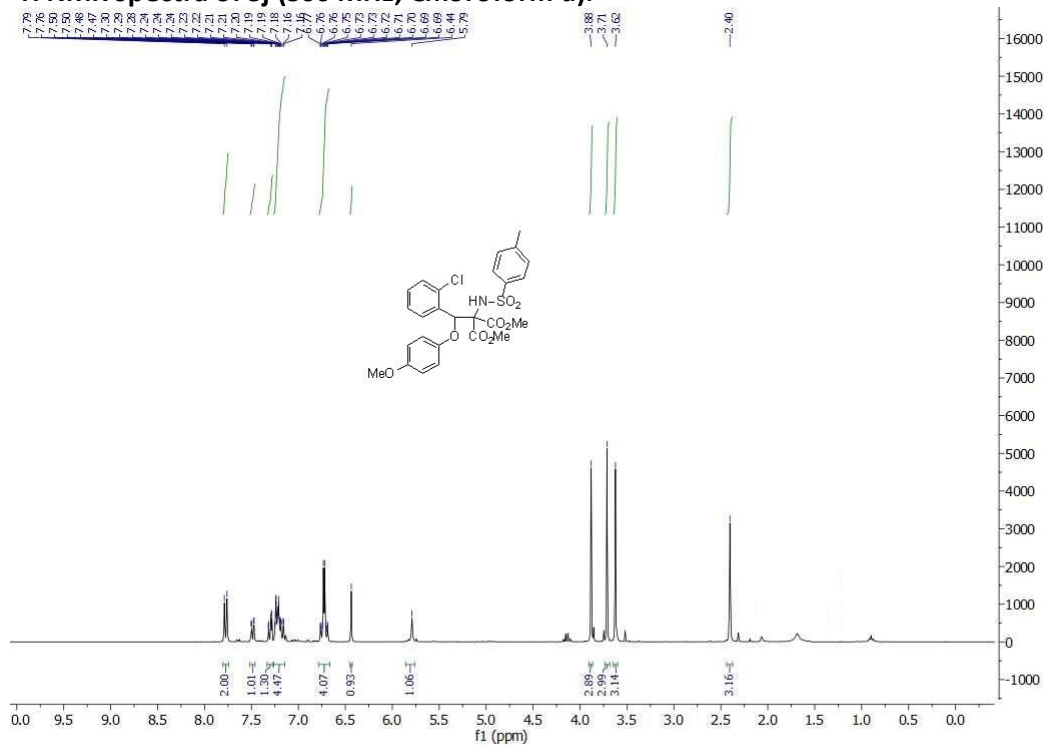

**<sup>13</sup>C {<sup>1</sup>H} NMR spectra of 3j (75 MHz, Chloroform-d):**

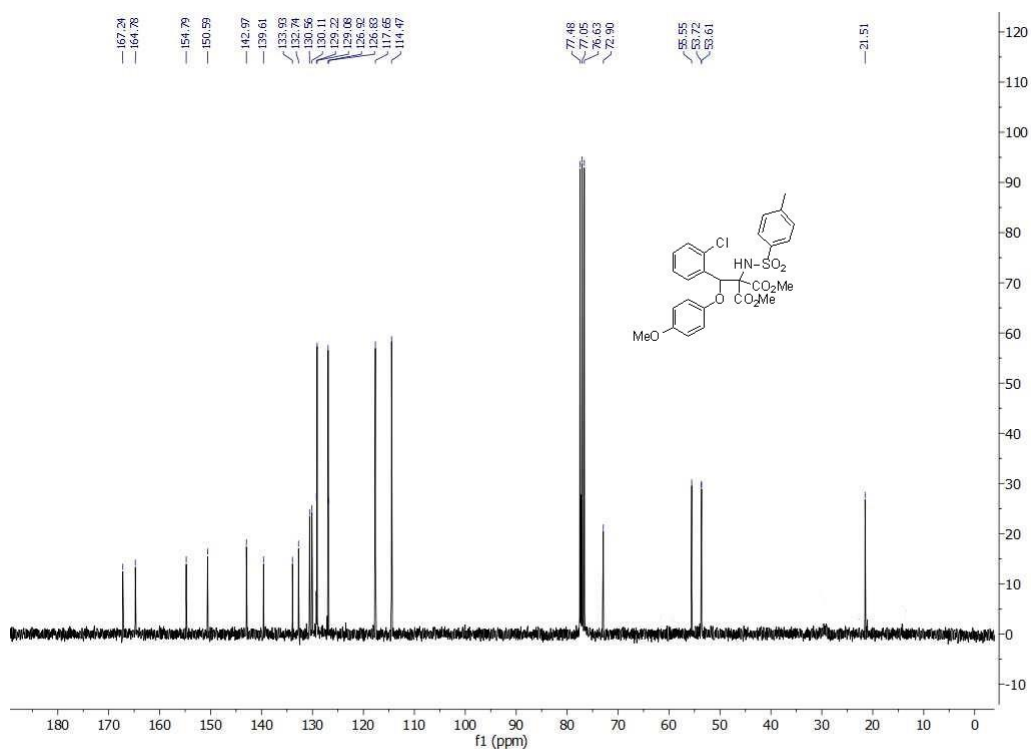

**<sup>1</sup>H NMR spectra of 3k (300 MHz, Chloroform-d):**

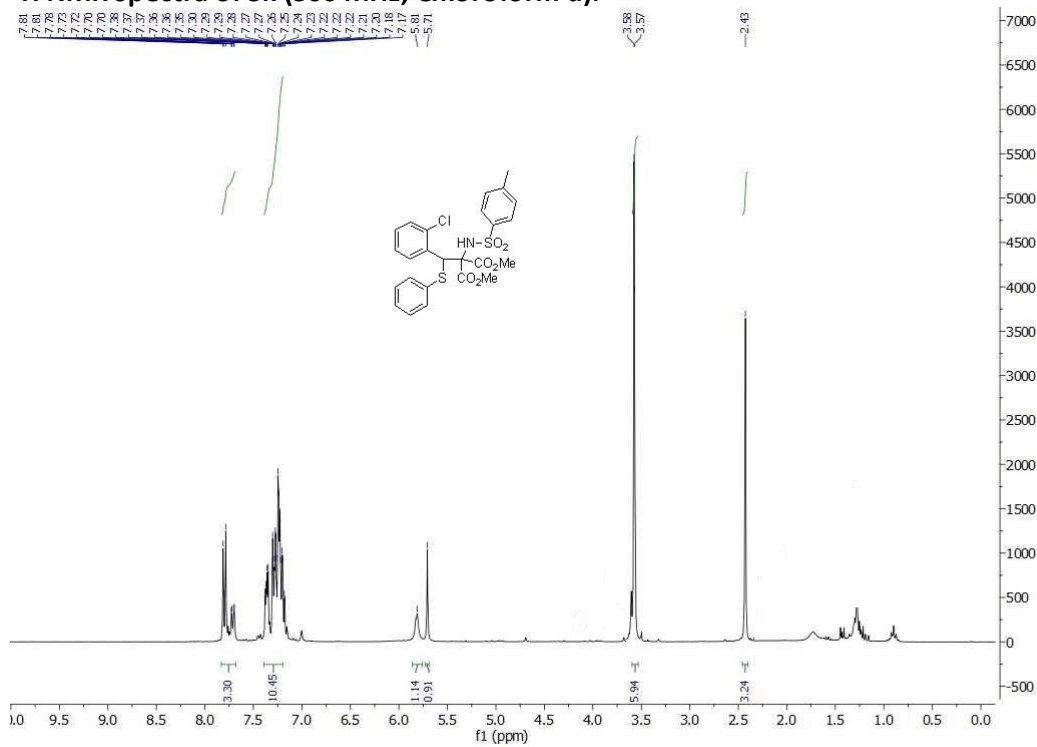

**<sup>13</sup>C {<sup>1</sup>H} NMR spectra of 3k (75 MHz, Chloroform-d):**

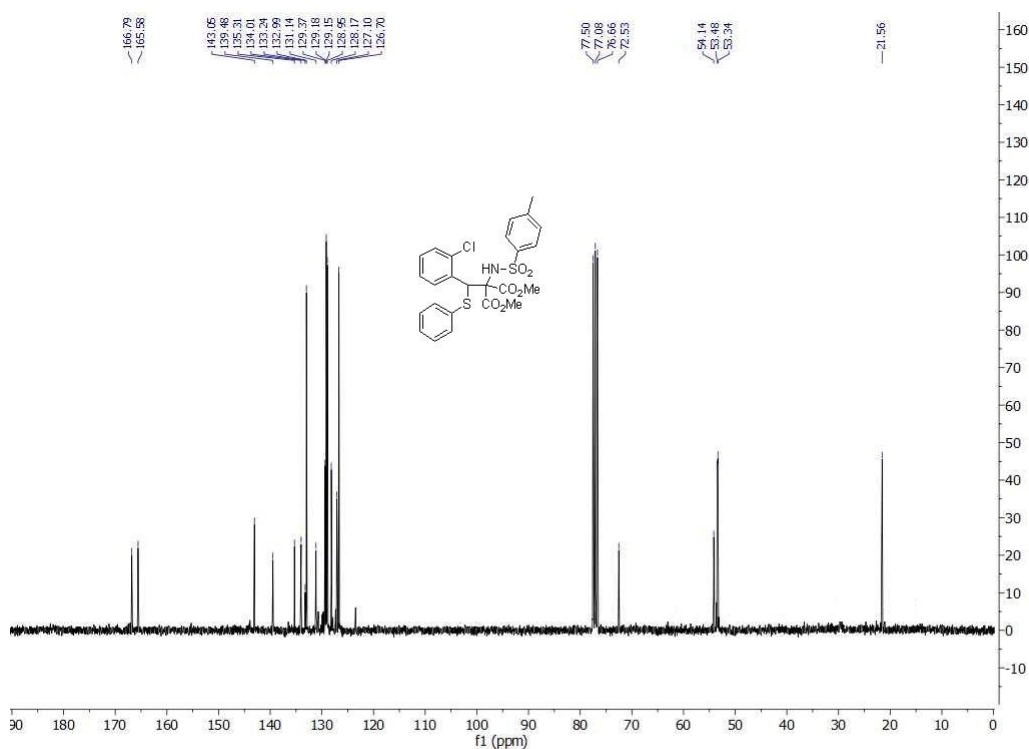



**<sup>1</sup>H NMR spectra of 3I (400 MHz, Chloroform-d):**

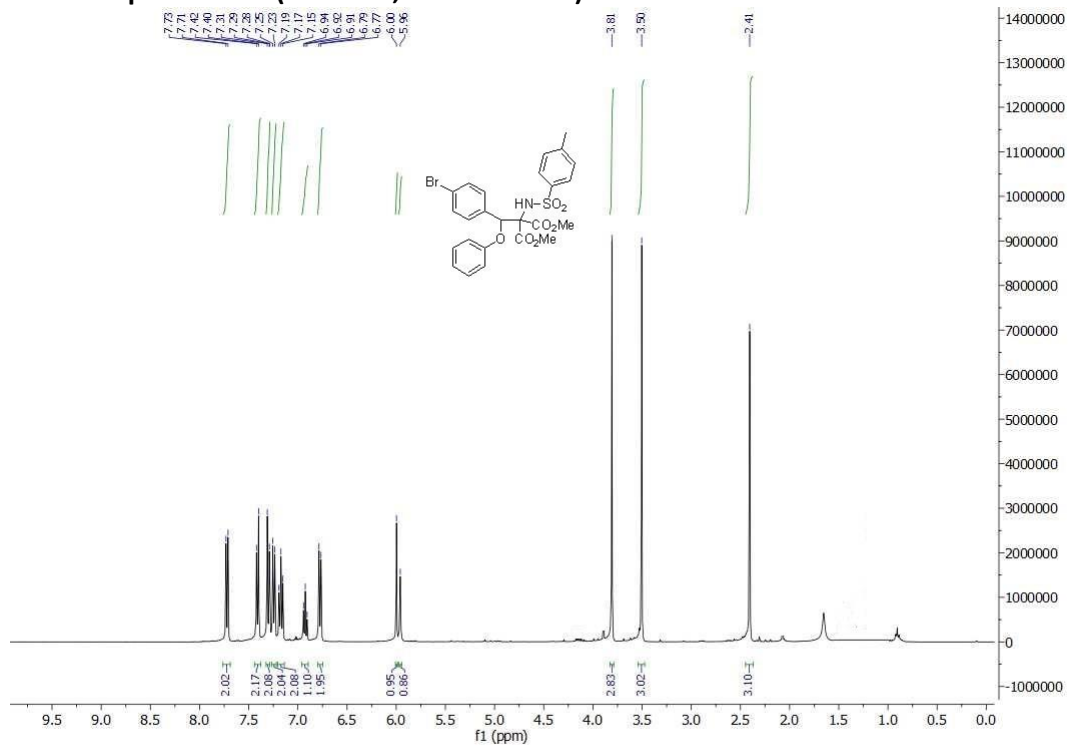

**<sup>13</sup>C {<sup>1</sup>H} NMR spectra of 3I (100 MHz, Chloroform-d):**

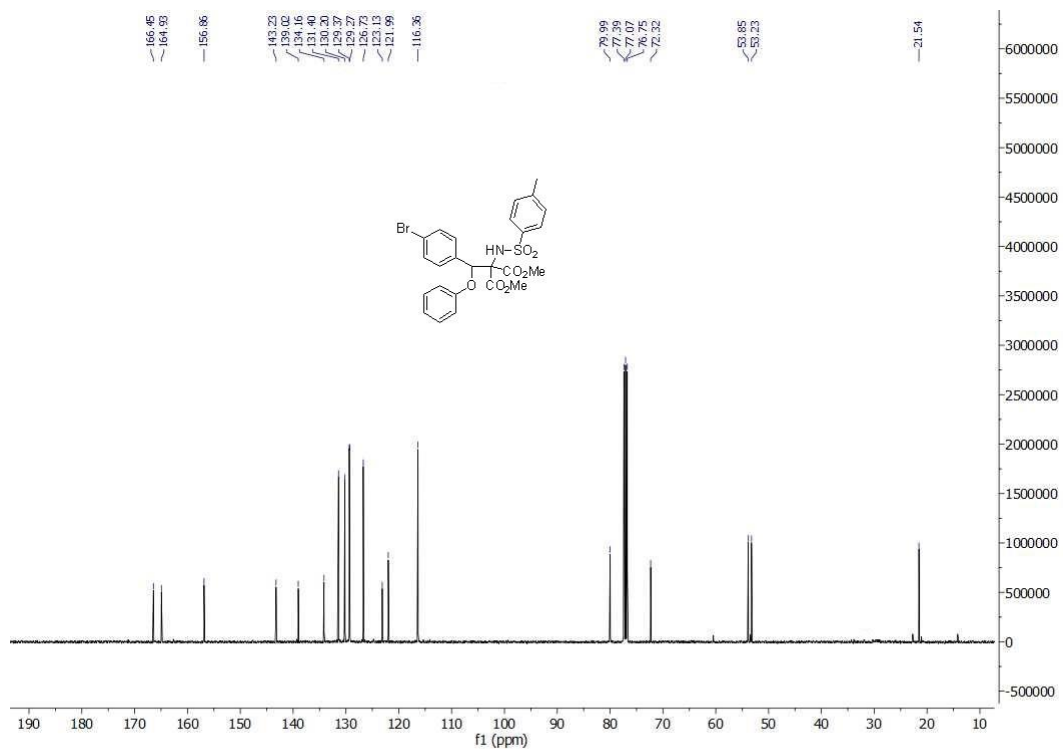

**<sup>1</sup>H NMR spectra of 3m (400 MHz, Chloroform-d):**

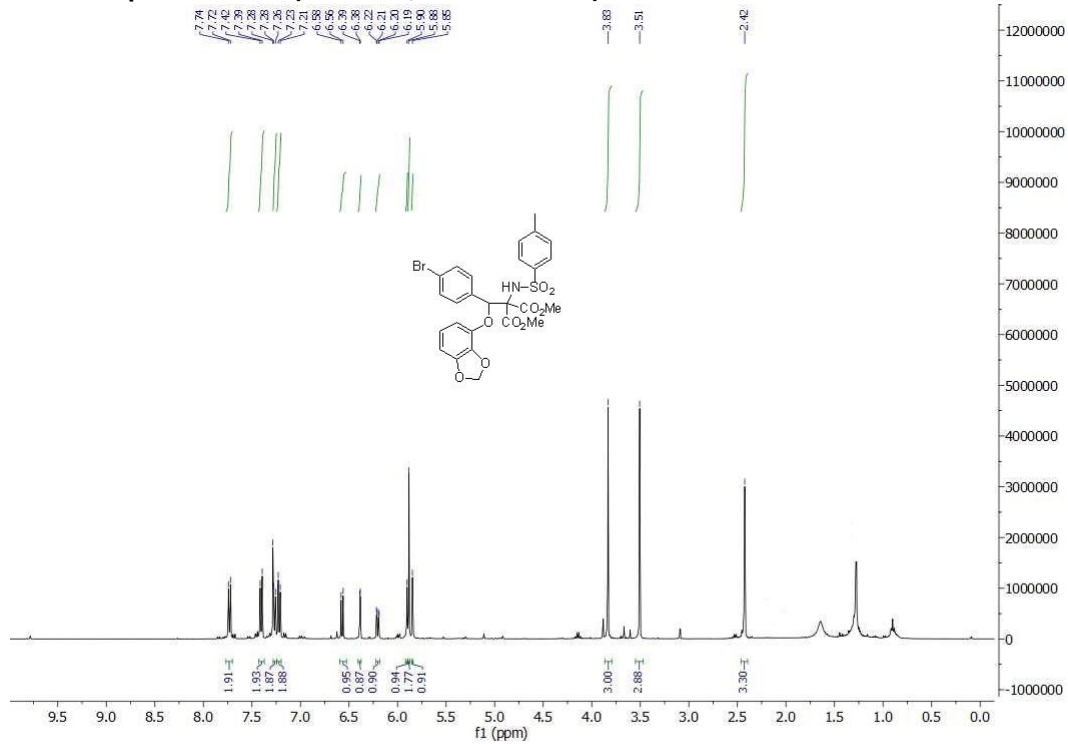

**<sup>13</sup>C {<sup>1</sup>H} NMR spectra of 3m (100 MHz, Chloroform-d):**

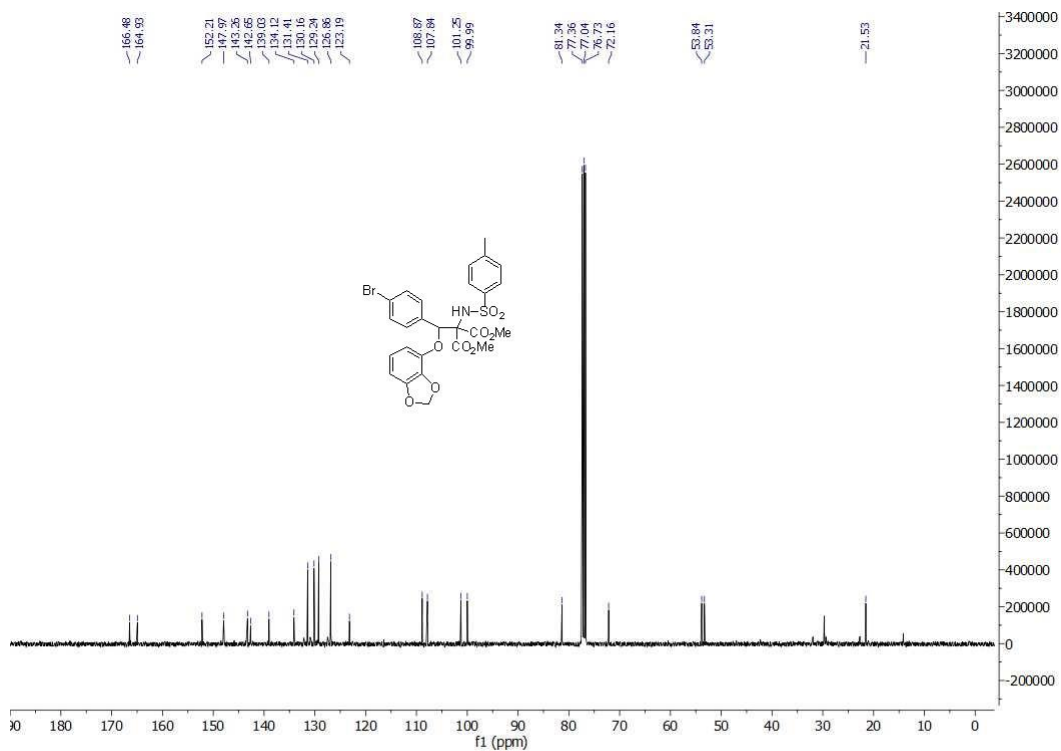

**<sup>1</sup>H NMR spectra of 3n (300 MHz, Chloroform-d):**

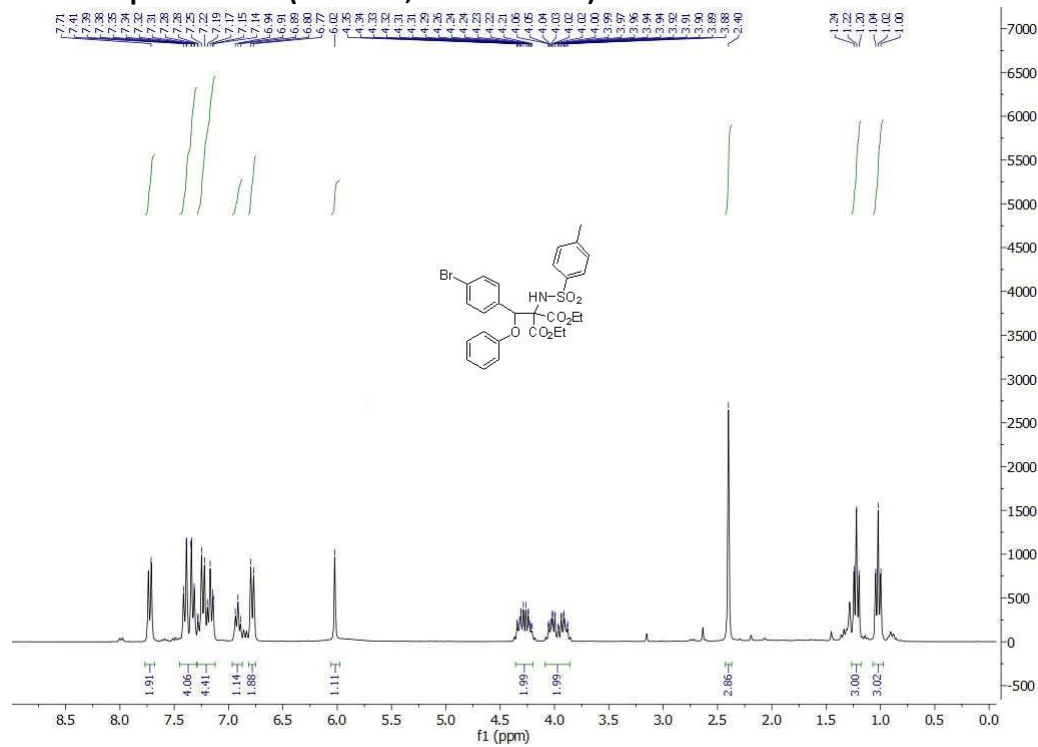

**<sup>13</sup>C {<sup>1</sup>H} NMR spectra of 3n (75 MHz, Chloroform-d):**

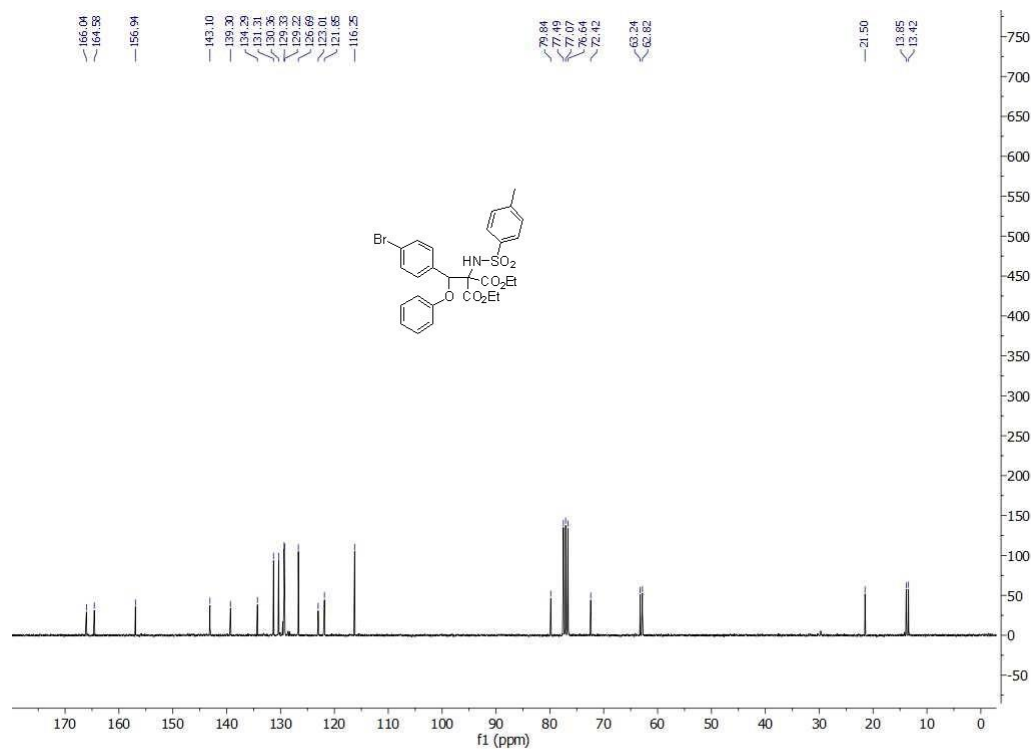

**<sup>1</sup>H NMR spectra of 3o (400 MHz, Chloroform-d):**

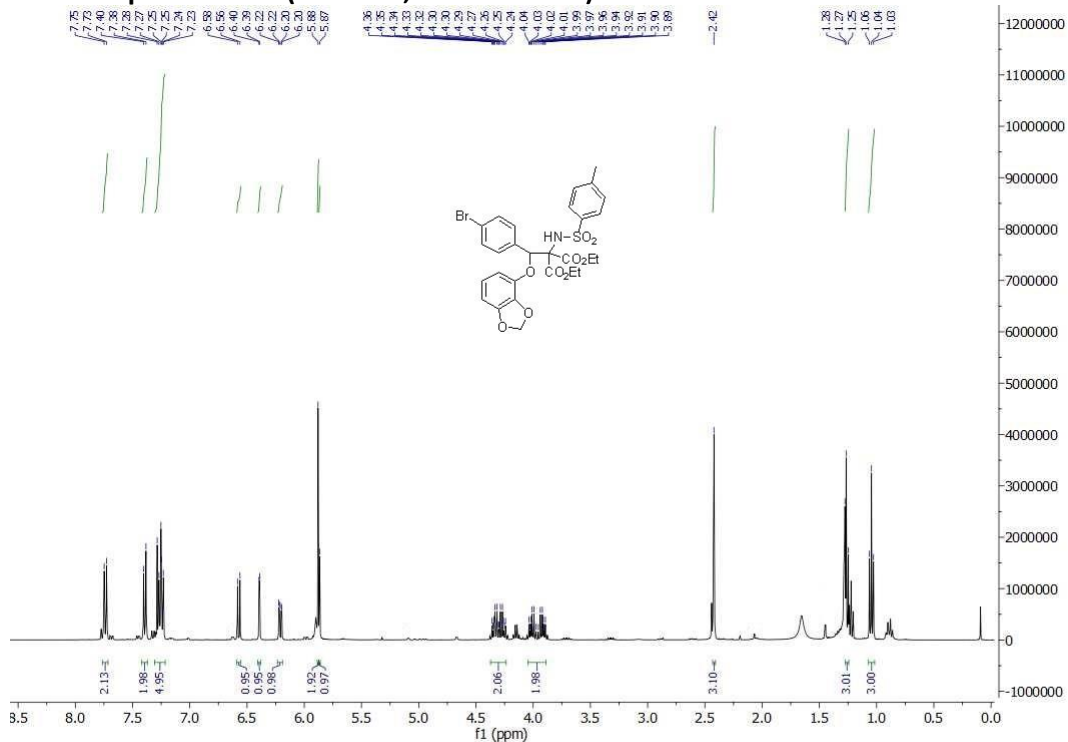

**<sup>13</sup>C {<sup>1</sup>H} NMR spectra of 3o (100 MHz, Chloroform-d):**

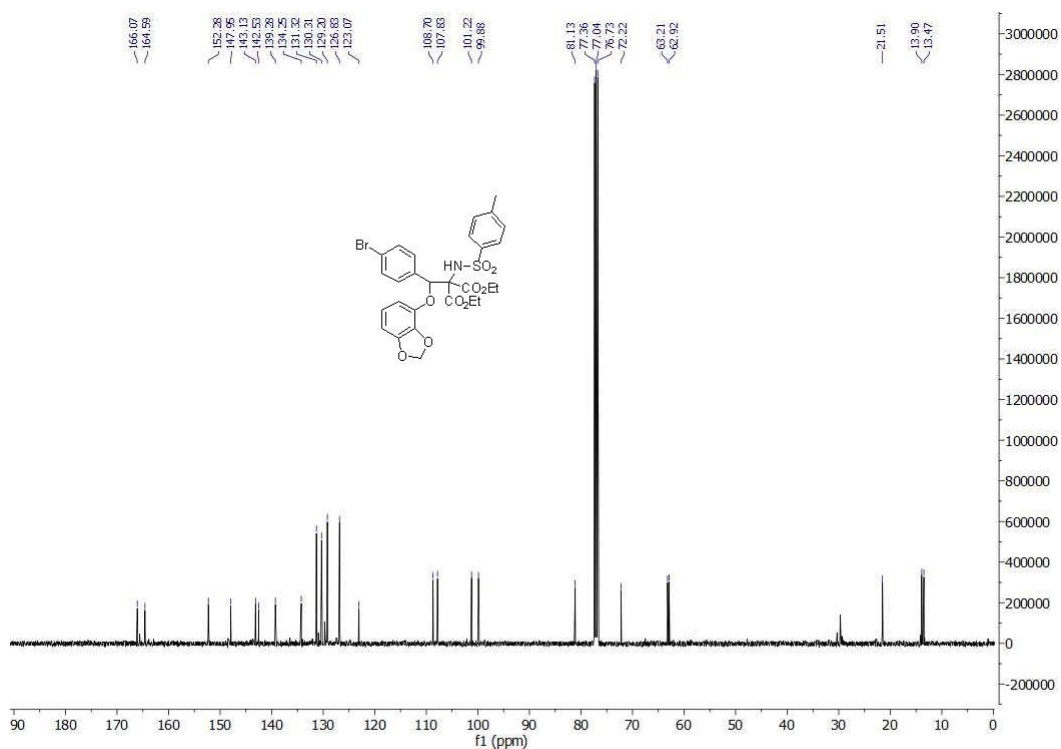

**<sup>1</sup>H NMR spectra of 3p (400 MHz, Chloroform-d):**

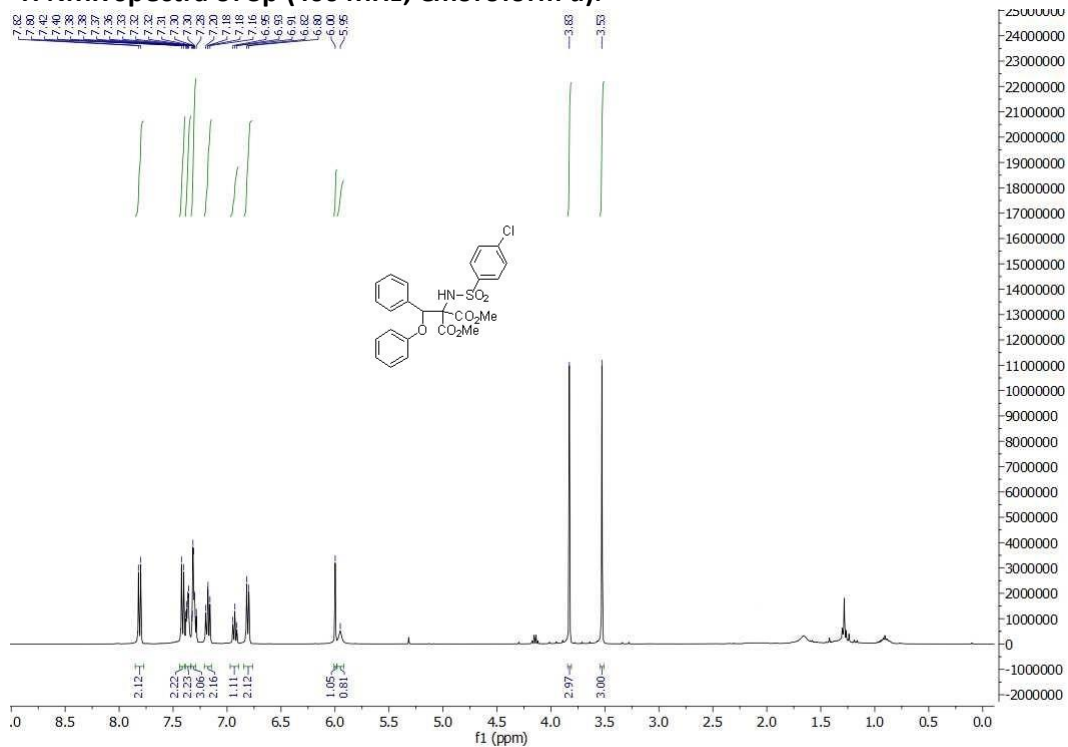

**<sup>13</sup>C {<sup>1</sup>H} NMR spectra of 3p (100 MHz, Chloroform-d):**

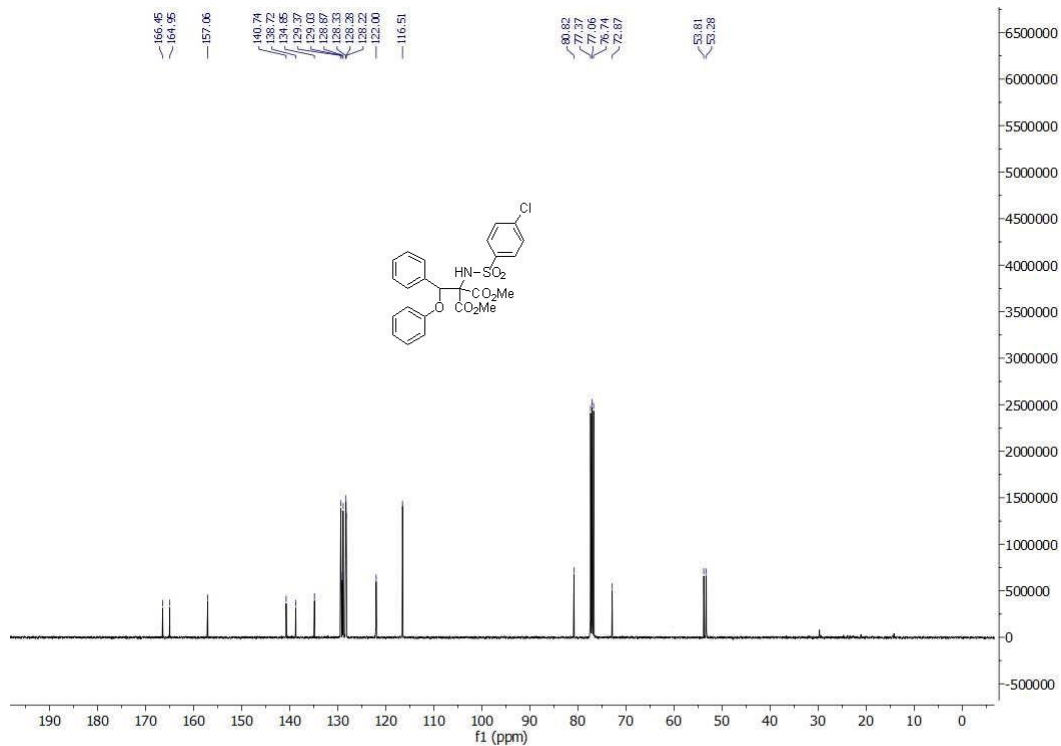

**<sup>1</sup>H NMR spectra of 3q (400 MHz, Chloroform-d):**

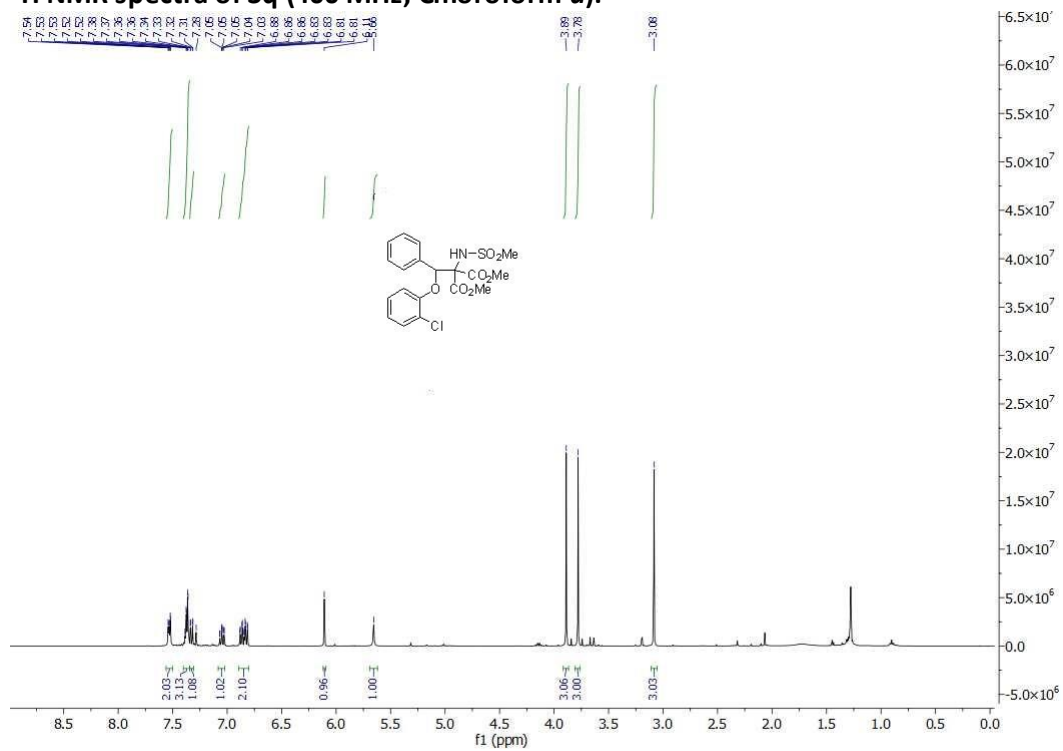

**<sup>13</sup>C {<sup>1</sup>H} NMR spectra of 3q (100 MHz, Chloroform-d):**

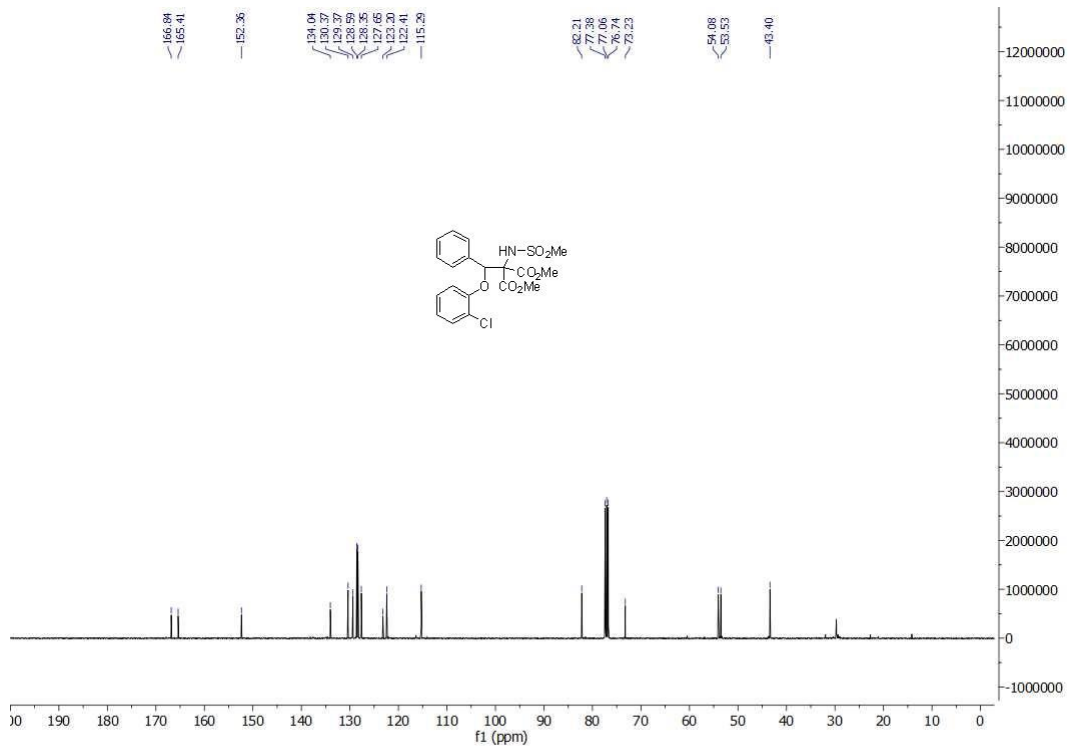

**<sup>1</sup>H NMR spectra of 3r (400 MHz, Chloroform-d):**

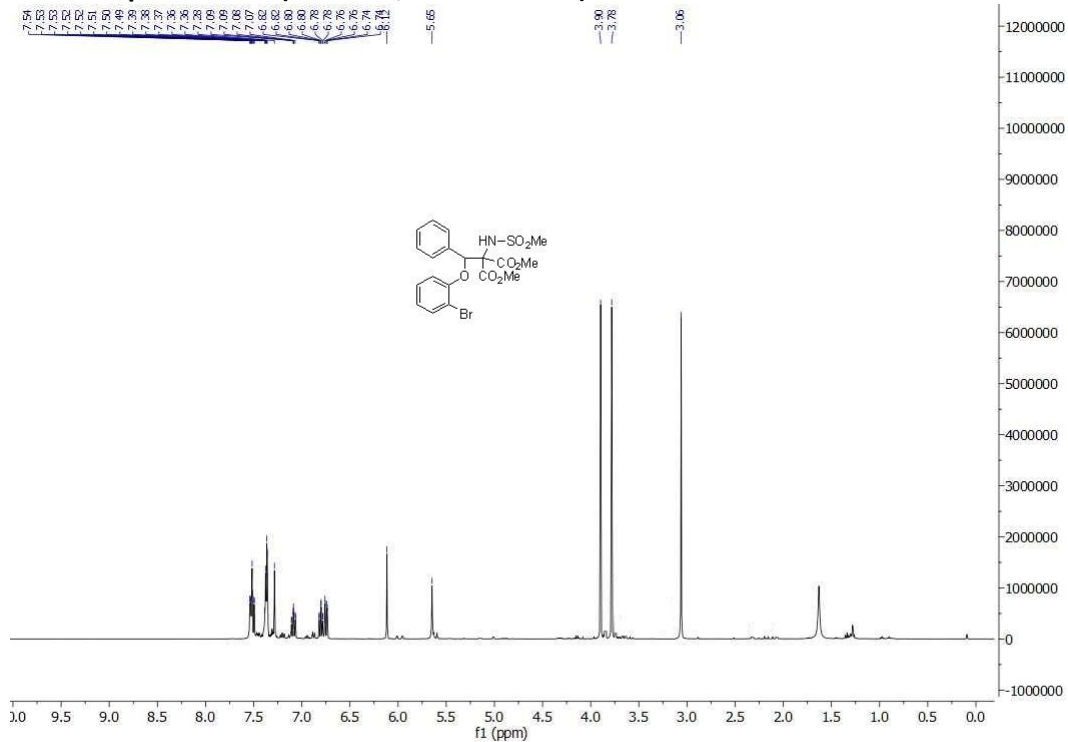

**<sup>13</sup>C {<sup>1</sup>H} NMR spectra of 3r (100 MHz, Chloroform-d):**

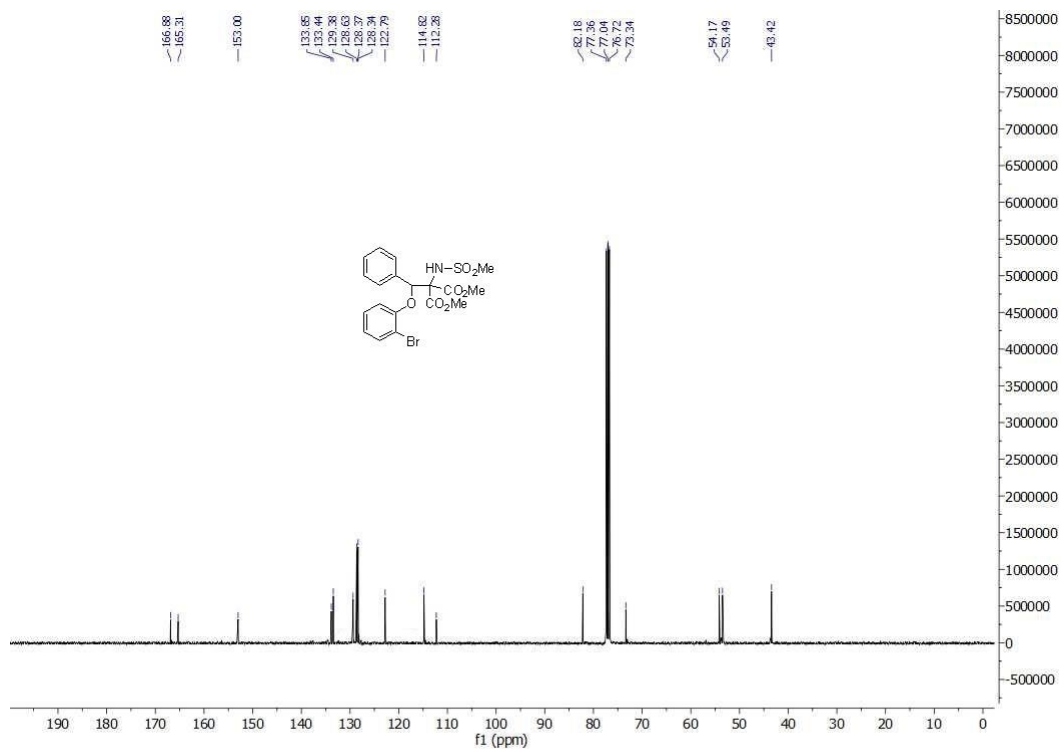

**<sup>1</sup>H NMR spectra of 3s (400 MHz, Chloroform-d):**

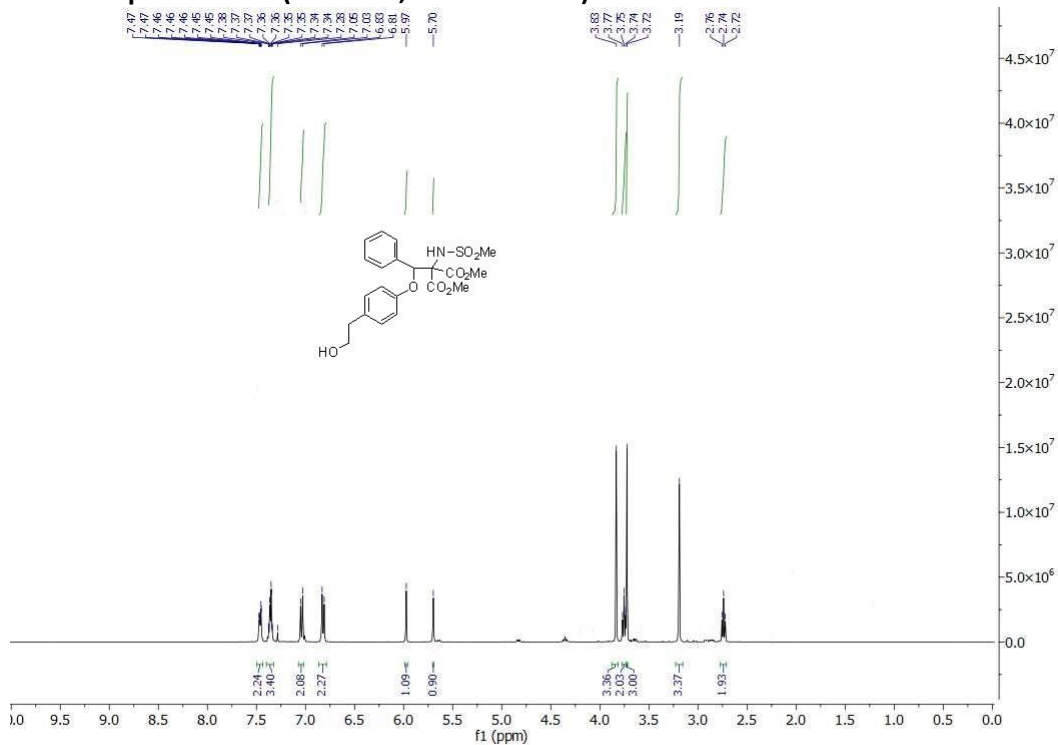

**<sup>13</sup>C {<sup>1</sup>H} NMR spectra of 3s (100 MHz, Chloroform-d):**

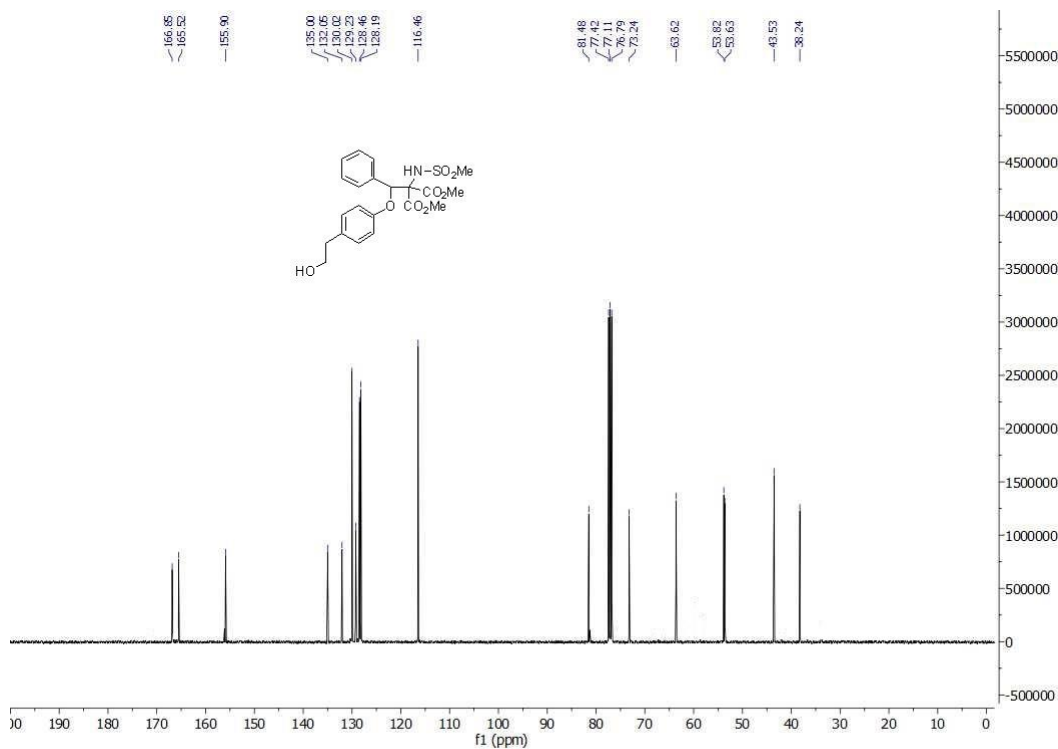



**<sup>1</sup>H NMR spectra of 3t (400 MHz, Chloroform-d):**

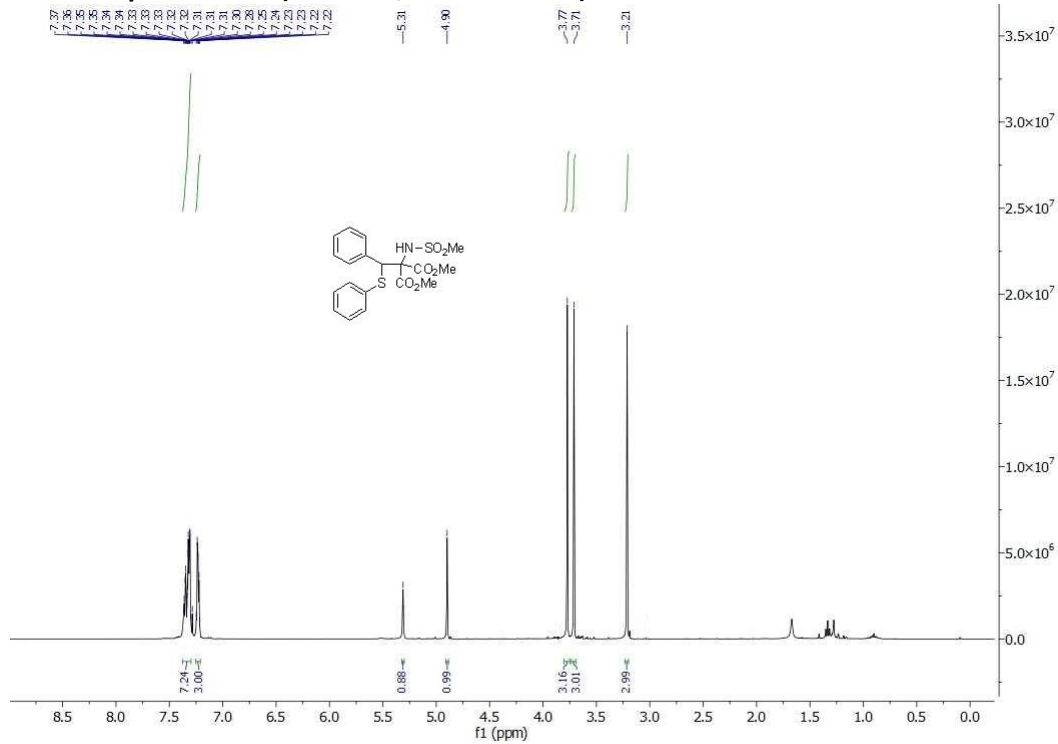

**<sup>13</sup>C {<sup>1</sup>H} NMR spectra of 3t (75 MHz, Chloroform-d):**

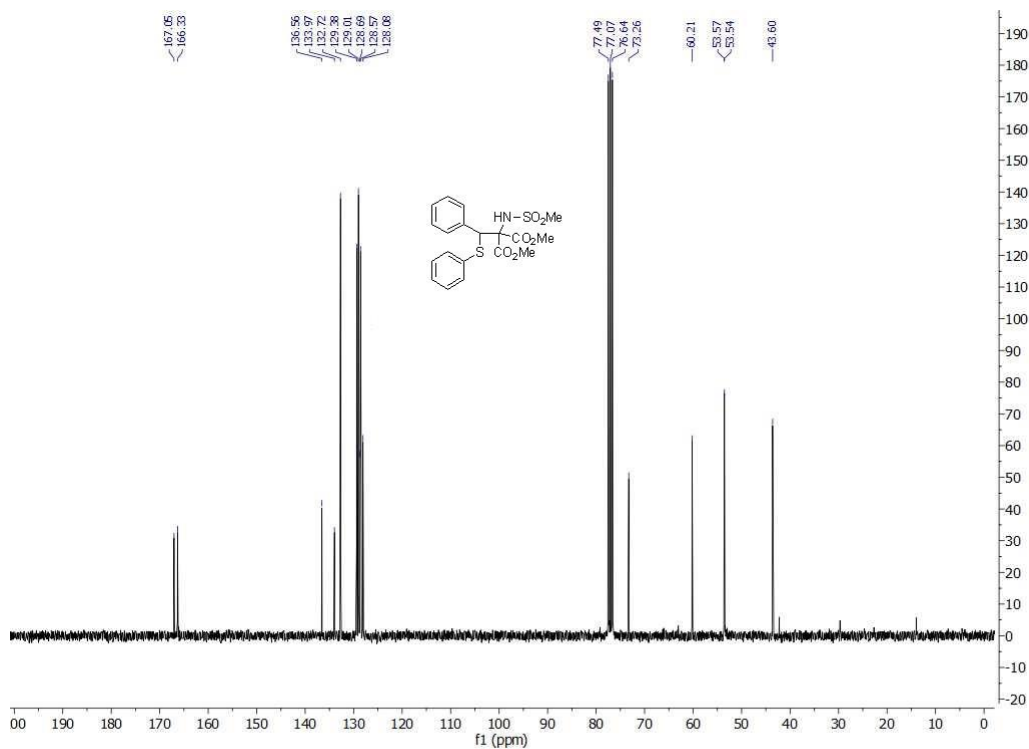

**<sup>1</sup>H NMR spectra of 3u (400 MHz, Chloroform-d):**

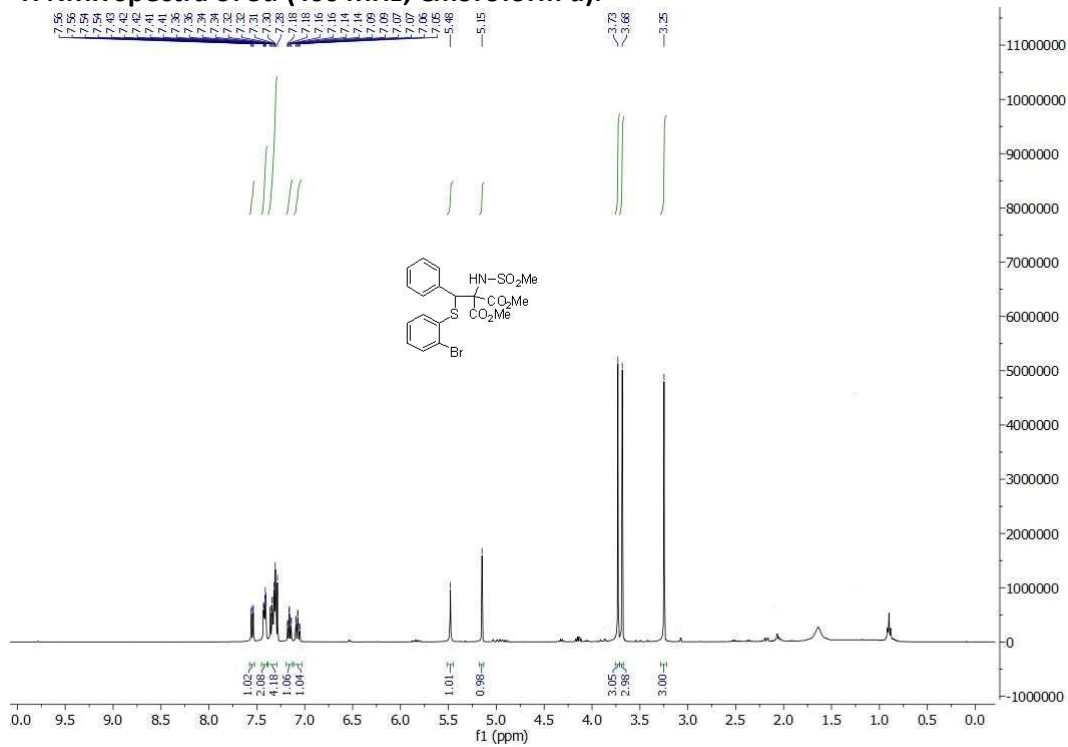

**<sup>13</sup>C {<sup>1</sup>H} NMR spectra of 3u (100 MHz, Chloroform-d):**

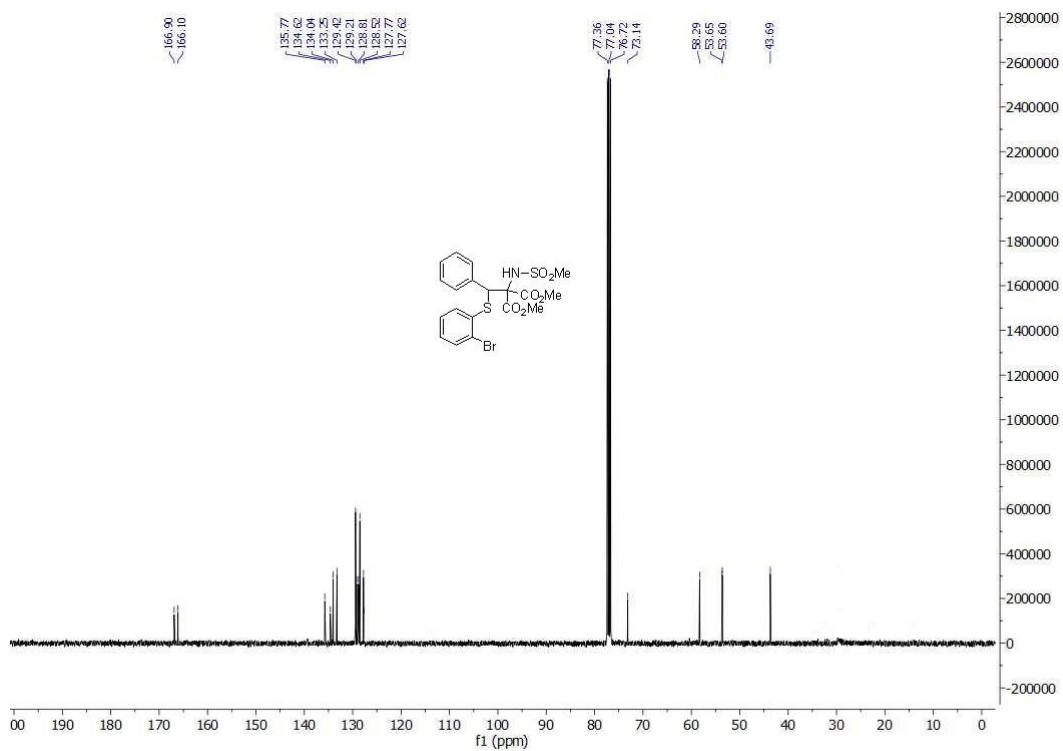

**<sup>1</sup>H NMR spectra of 4a (400 MHz, Chloroform-d):**

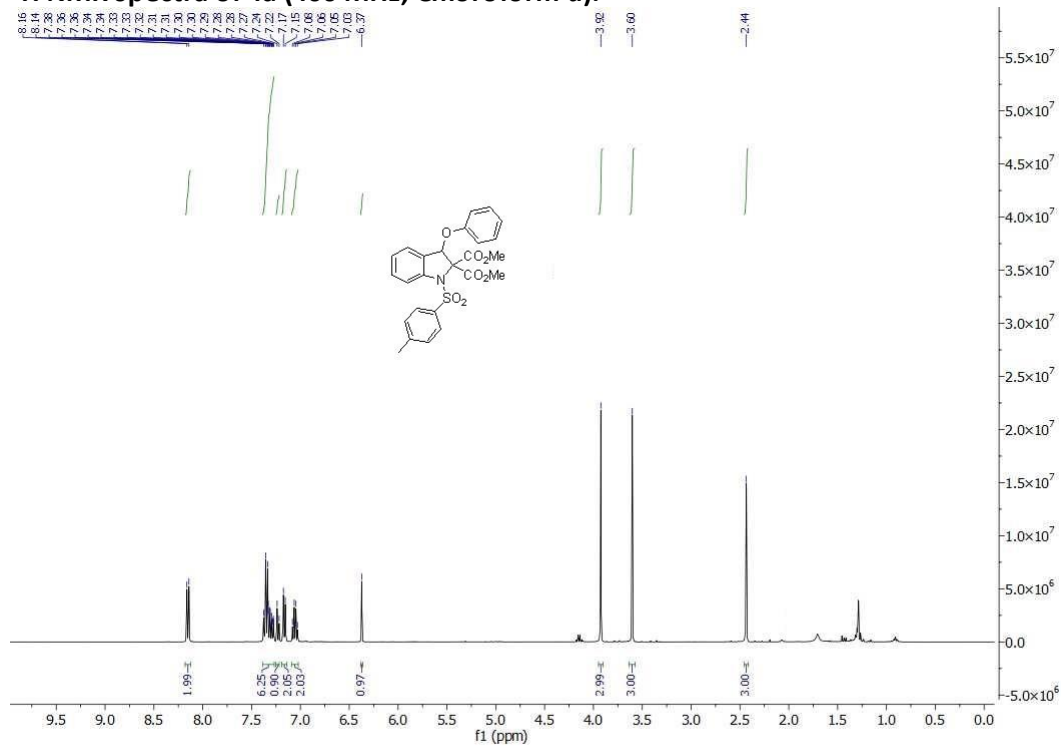

**<sup>13</sup>C {<sup>1</sup>H} NMR spectra of 4a (75 MHz, Chloroform-d):**

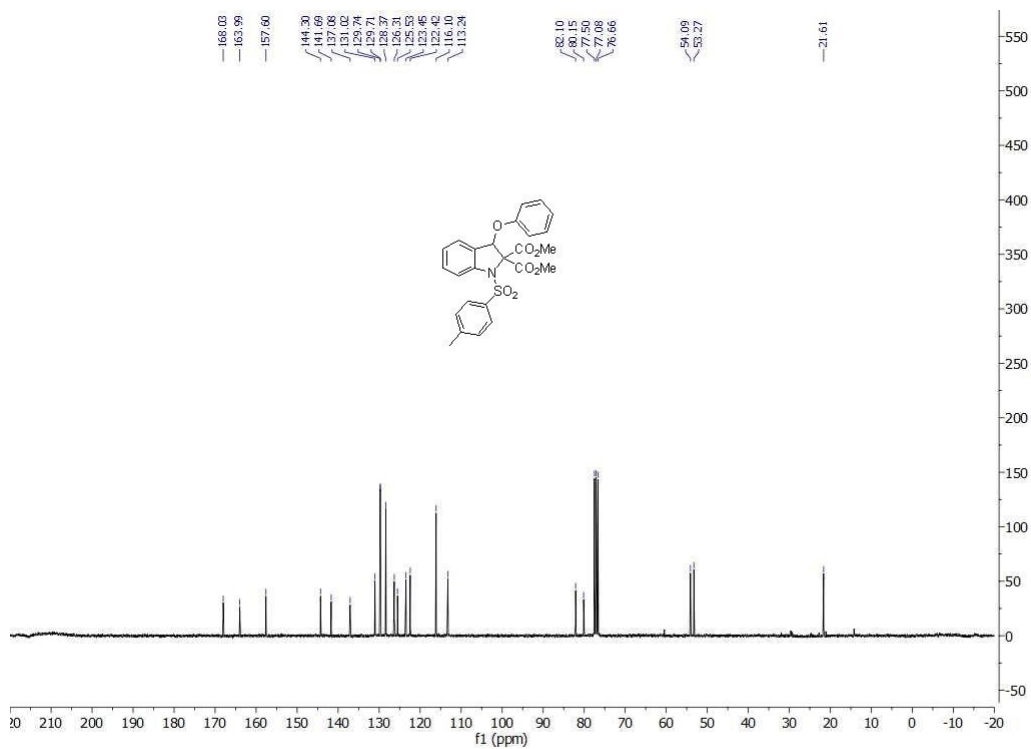

**<sup>1</sup>H NMR spectra of 4b (300 MHz, Chloroform-d):**

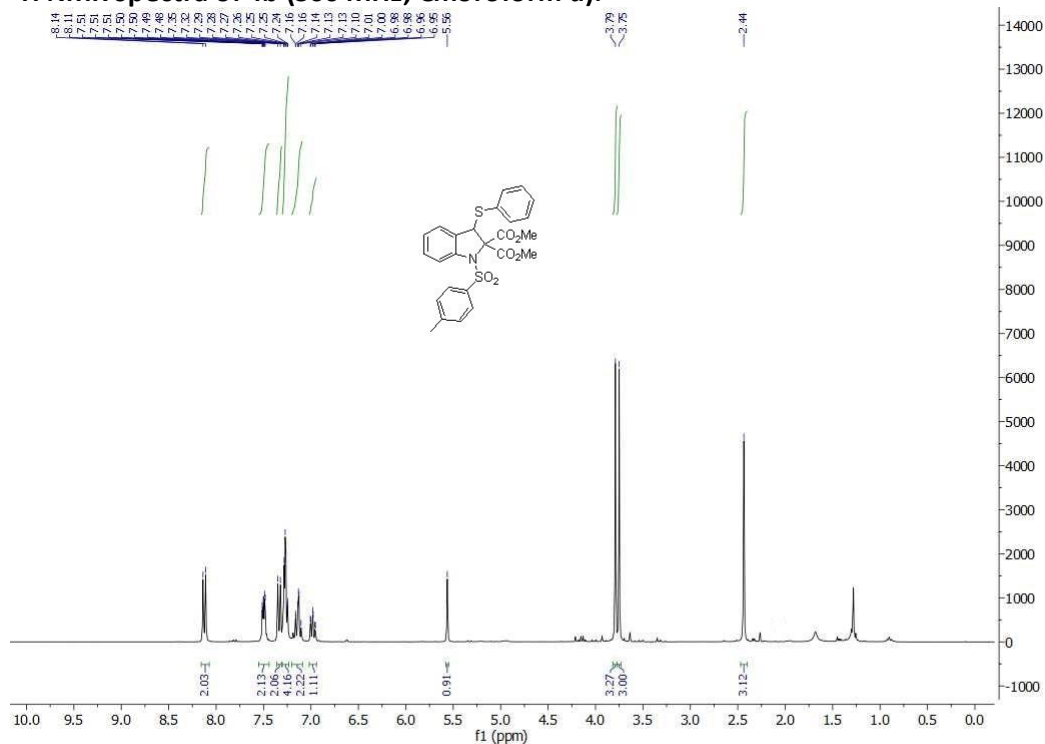

**<sup>13</sup>C {<sup>1</sup>H} NMR spectra of 4b (100 MHz, Chloroform-d):**

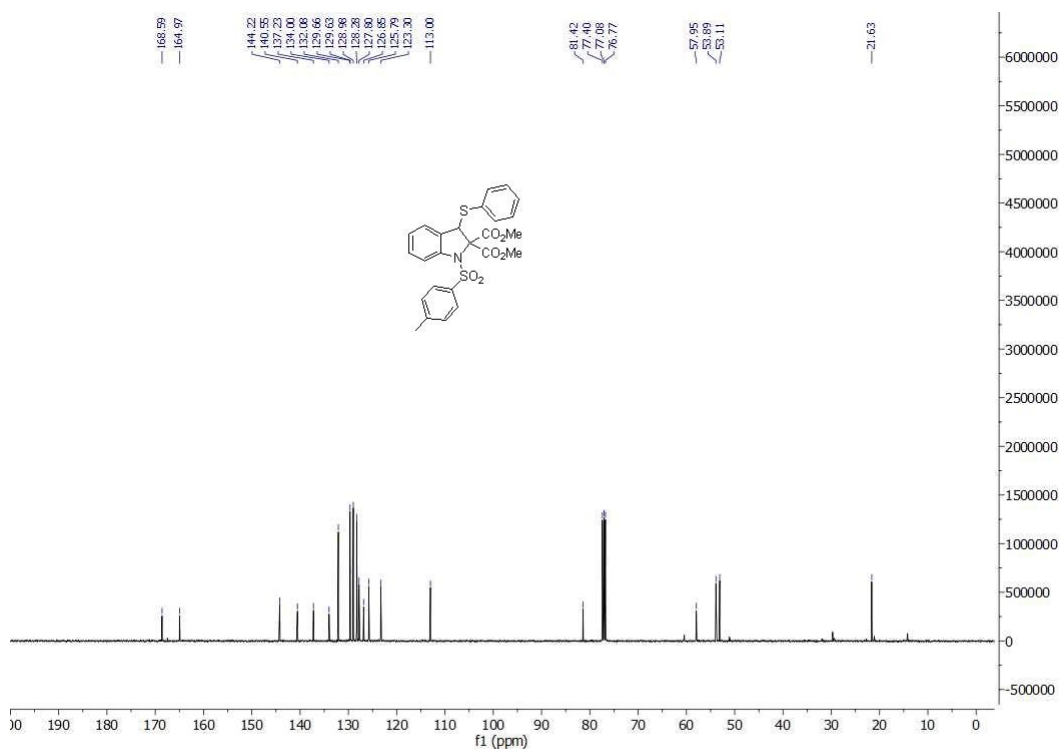

**<sup>1</sup>H NMR spectra of 4ab (300 MHz, Chloroform-*d*):**

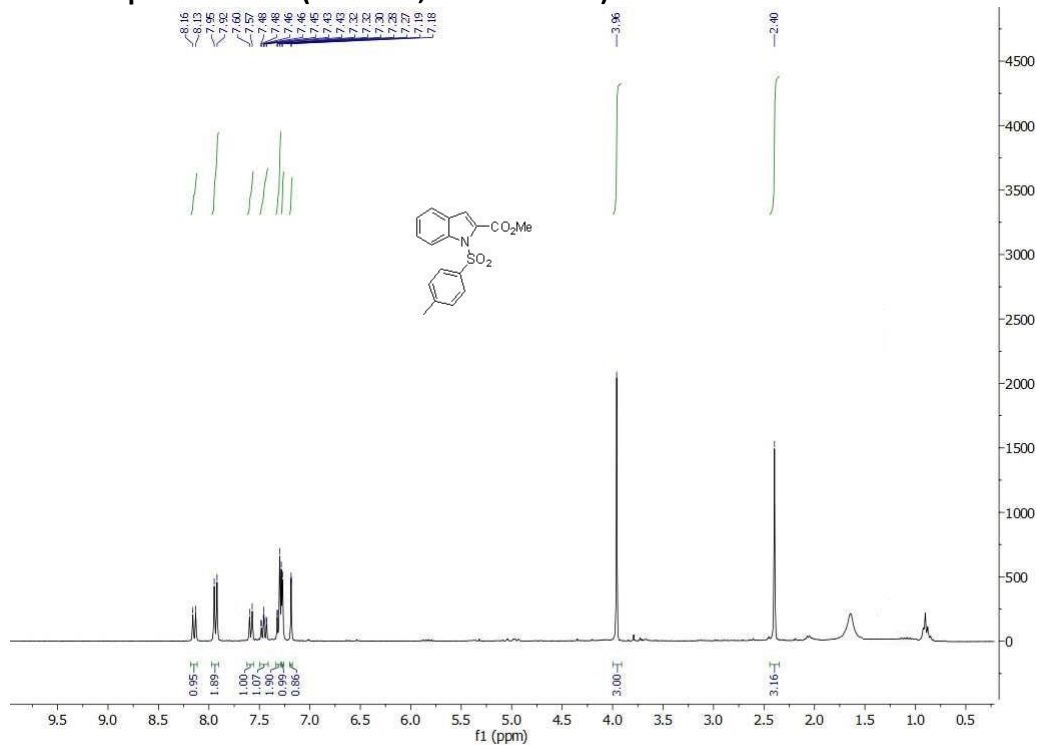

**<sup>13</sup>C {<sup>1</sup>H} NMR spectra of 4ab (100 MHz, Chloroform-*d*):**

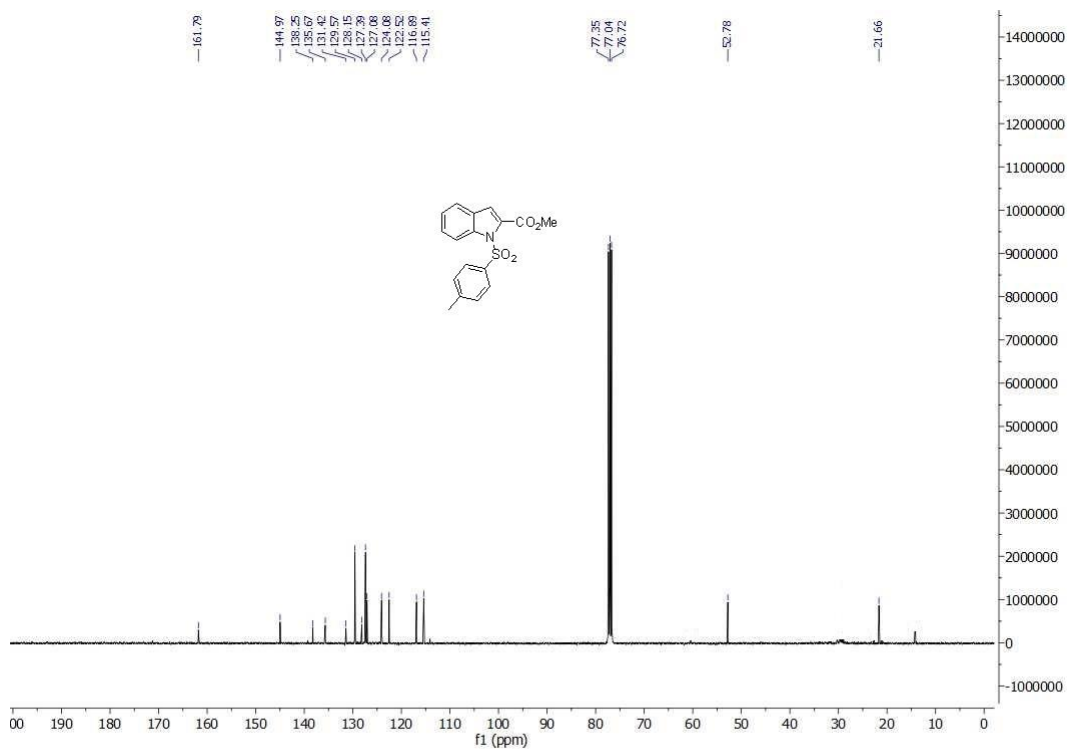

### <sup>1</sup>H NMR spectra of 5a (300 MHz, Chloroform-d):

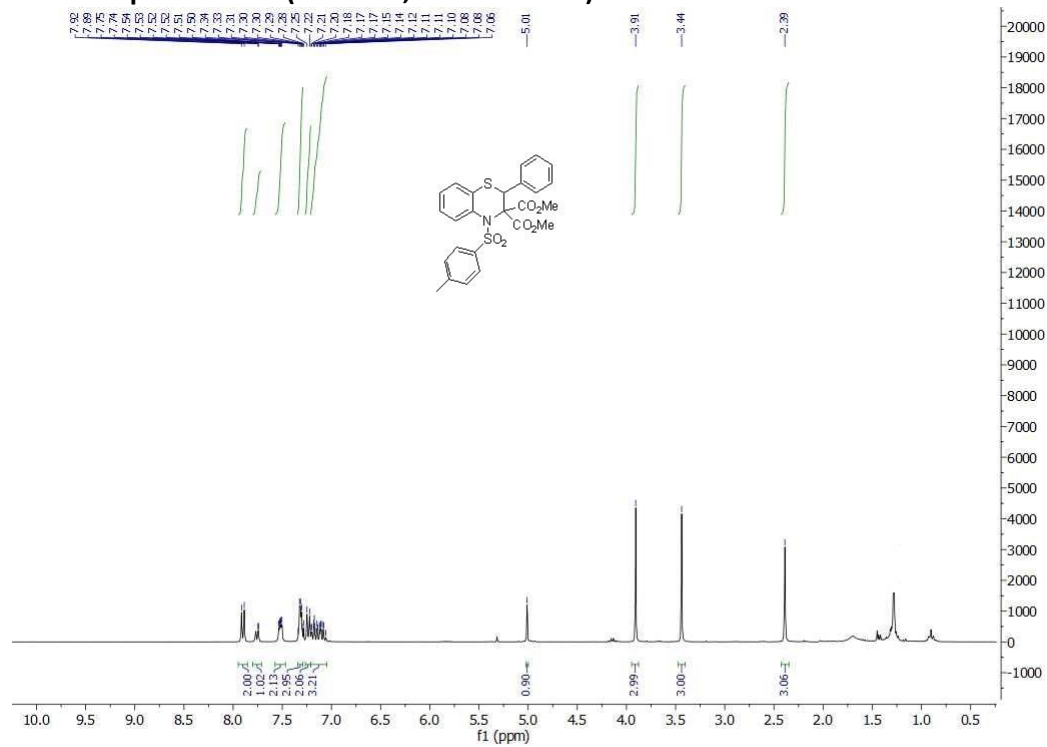

### <sup>13</sup>C {<sup>1</sup>H} NMR spectra of 5a (75 MHz, Chloroform-d):

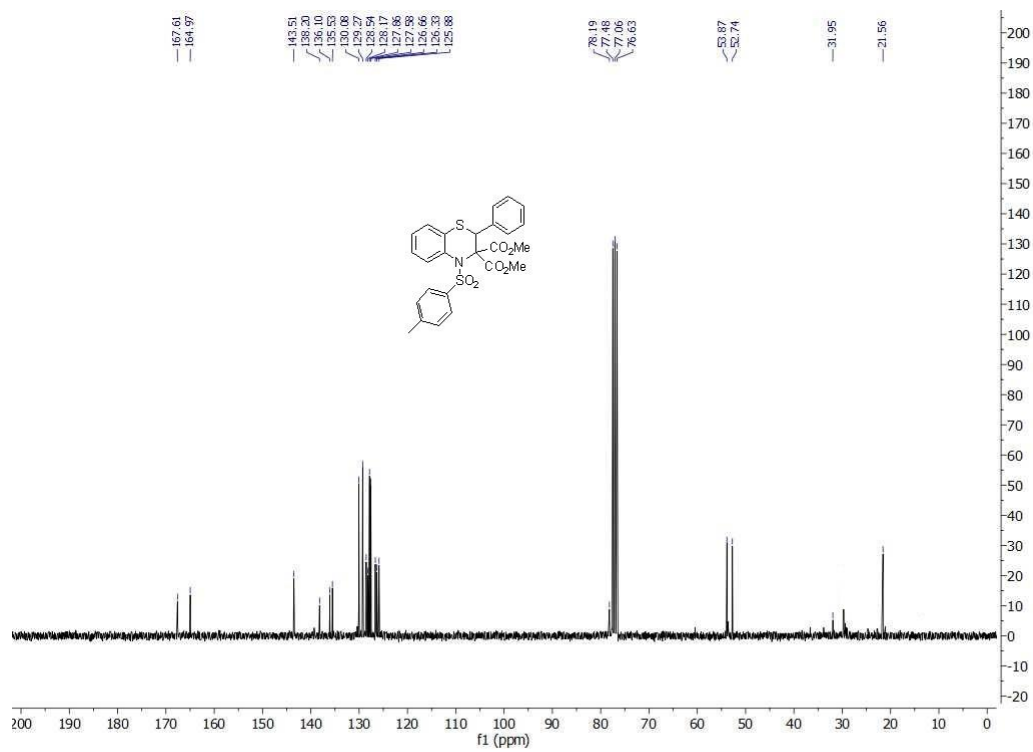

**<sup>1</sup>H NMR spectra of 5a' (300 MHz, Chloroform-d):**

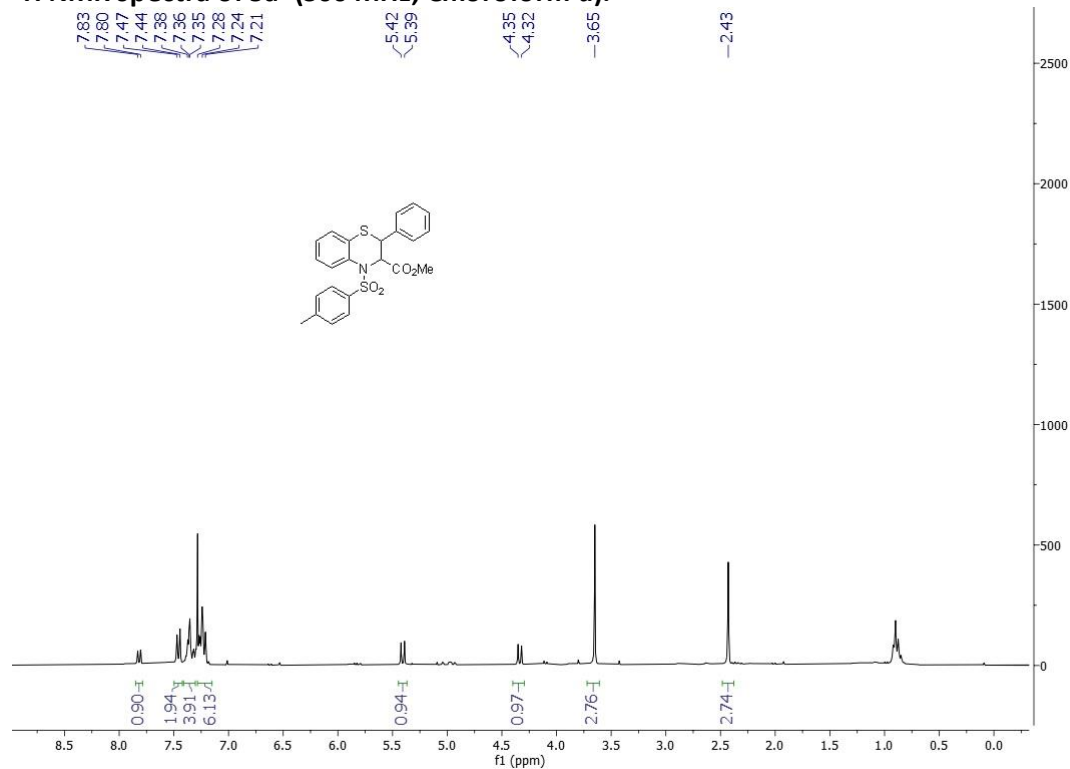

**<sup>13</sup>C {<sup>1</sup>H} NMR spectra of 5a' (75 MHz, Chloroform-d):**

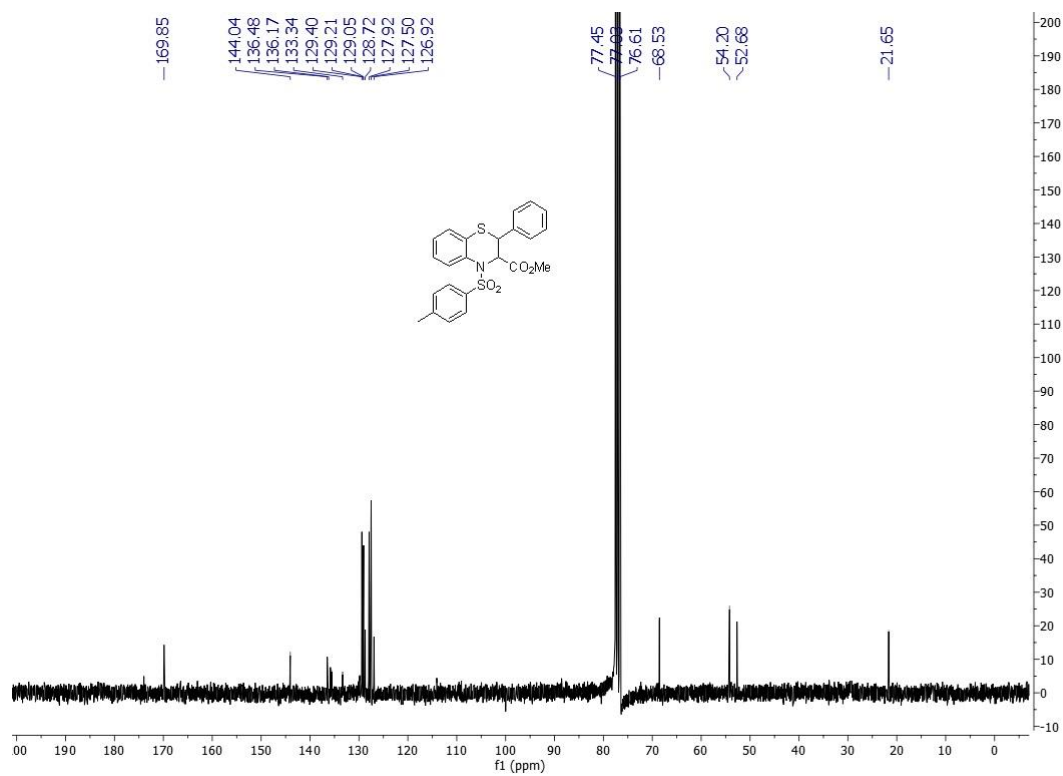

**<sup>1</sup>H NMR spectra of 5b (400 MHz, Chloroform-d):**

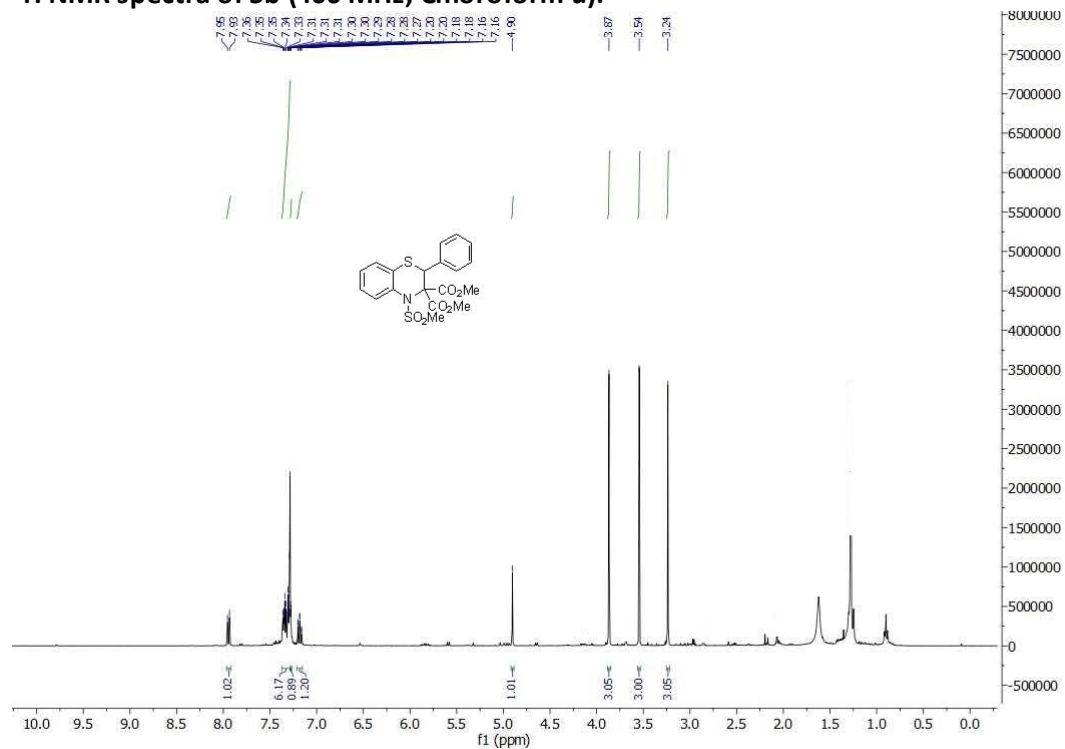

**<sup>13</sup>C {<sup>1</sup>H} NMR spectra of 5b (100 MHz, Chloroform-d):**

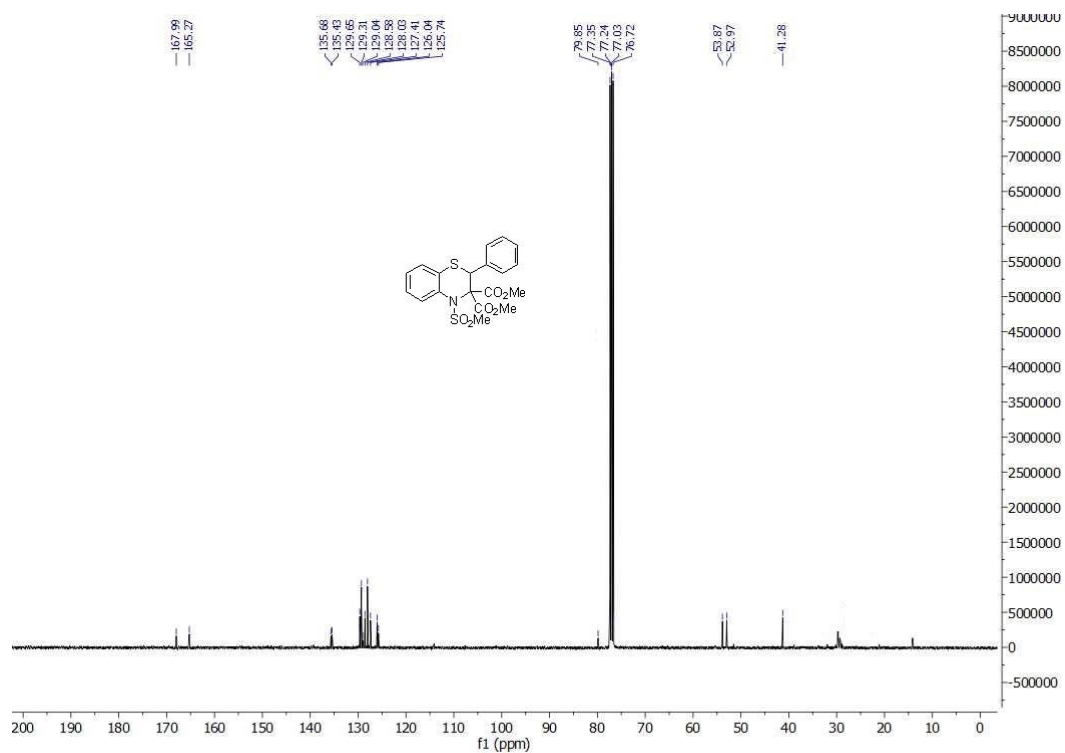



**<sup>1</sup>H NMR spectra of 5b' (400 MHz, Chloroform-d):**

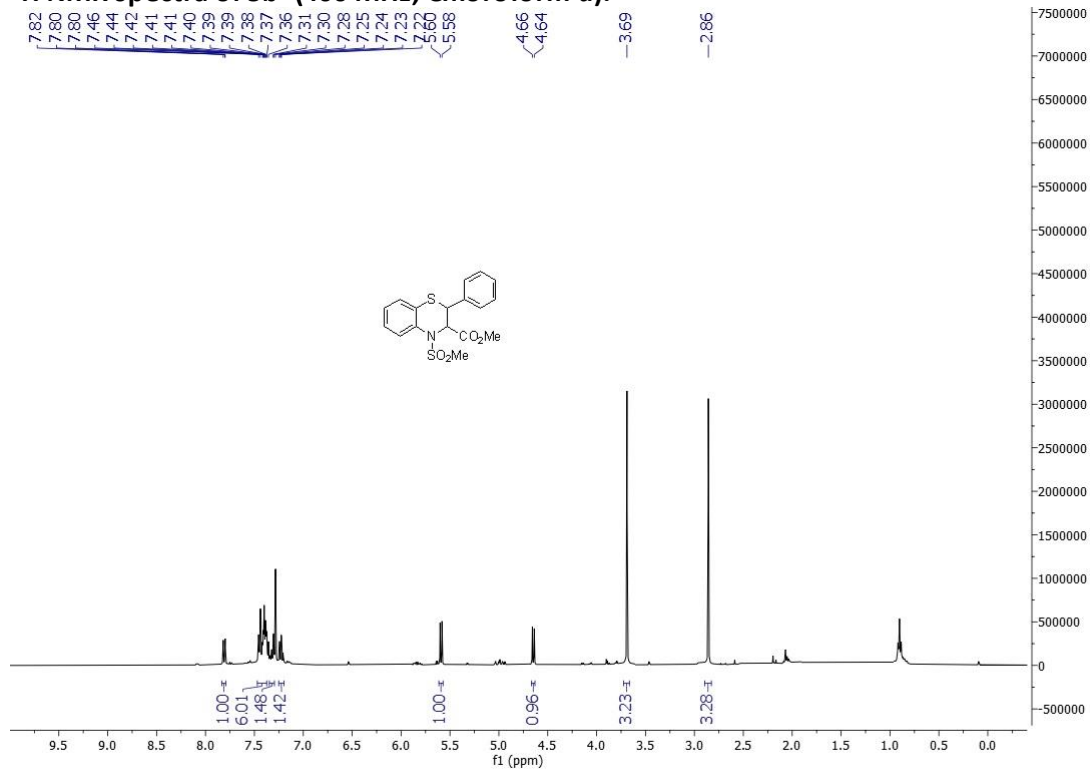

**<sup>13</sup>C {<sup>1</sup>H} NMR spectra of 5b' (100 MHz, Chloroform-d):**

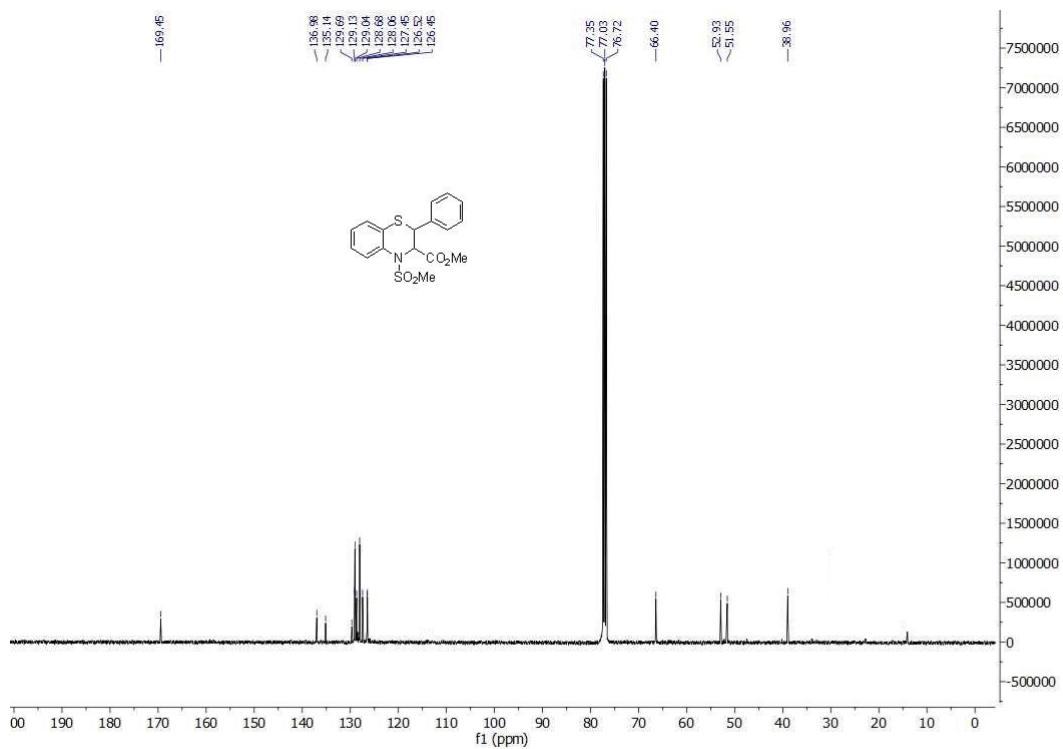

**<sup>1</sup>H NMR spectra of 6a (400 MHz, Chloroform-*d*):**

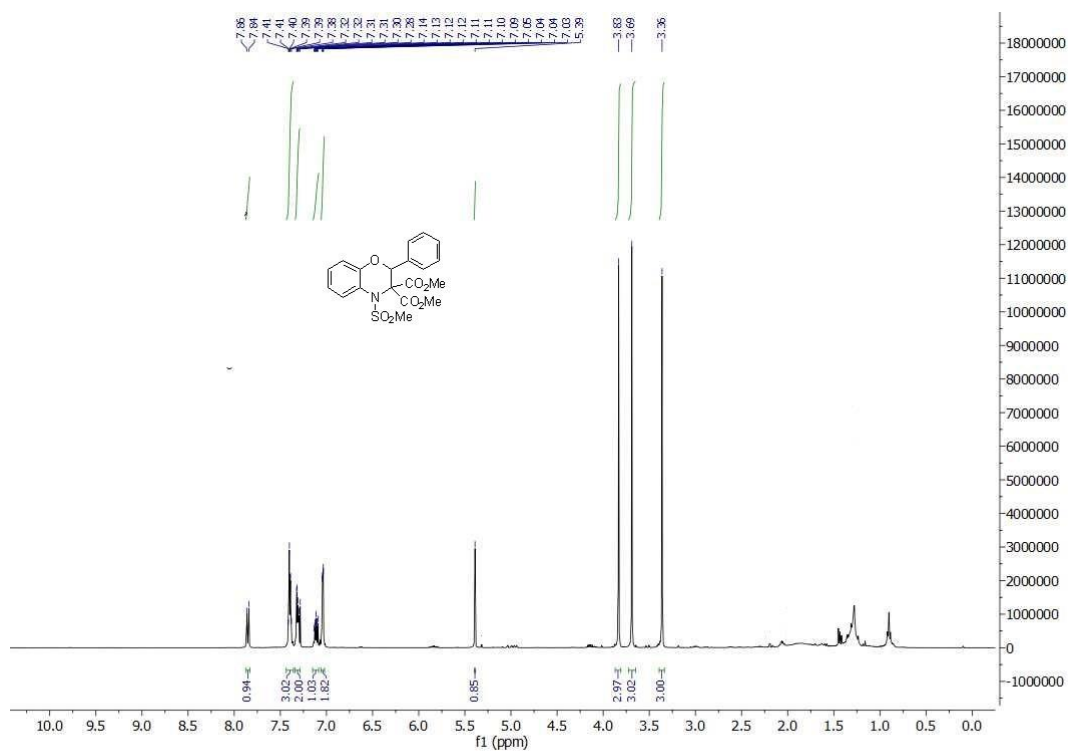

**<sup>13</sup>C {<sup>1</sup>H} NMR spectra of 6a (75 MHz, Chloroform-*d*):**

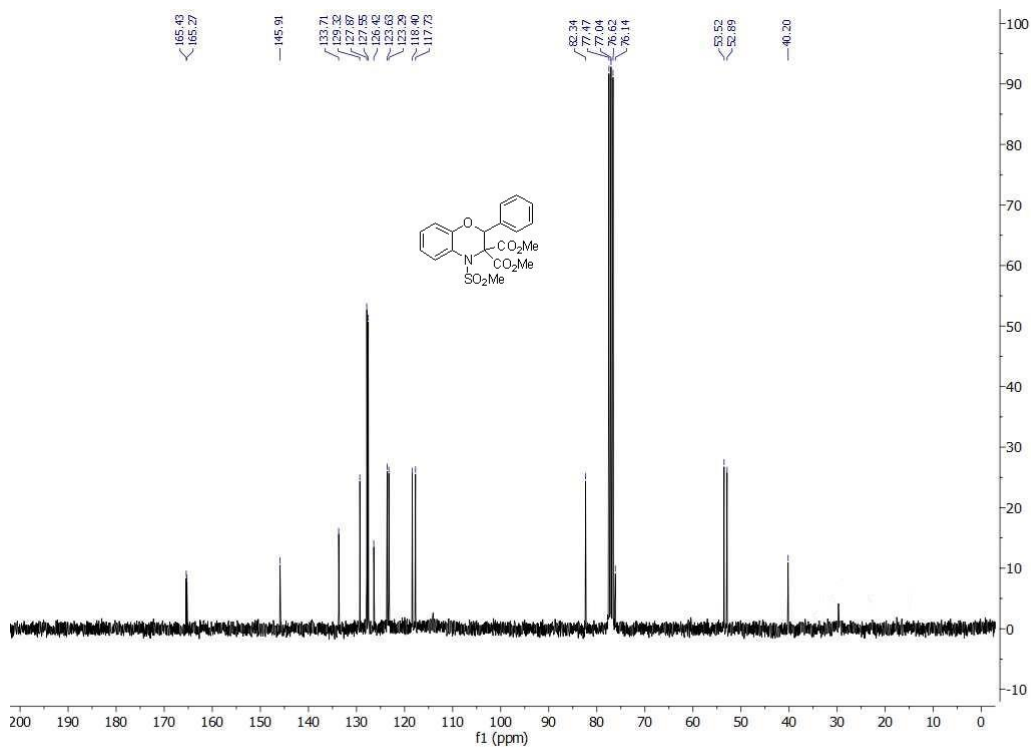

**<sup>1</sup>H NMR spectra of 7a (400 MHz, Chloroform-*d*):**

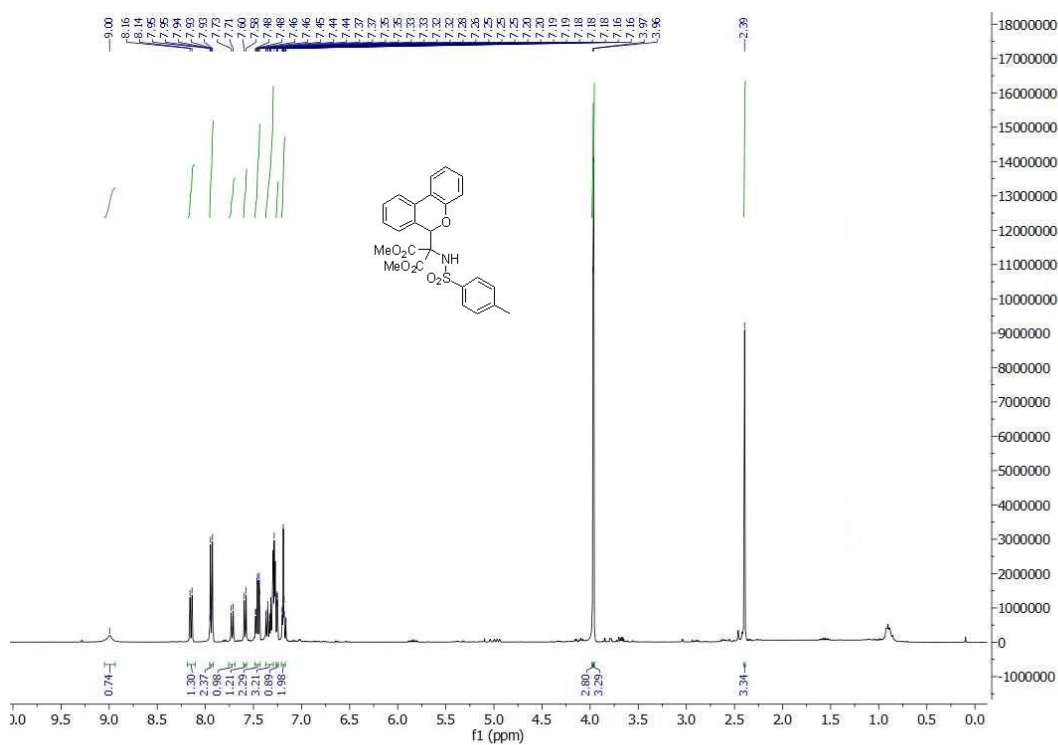

**<sup>13</sup>C {<sup>1</sup>H} NMR spectra of 7a (75 MHz, Chloroform-*d*):**

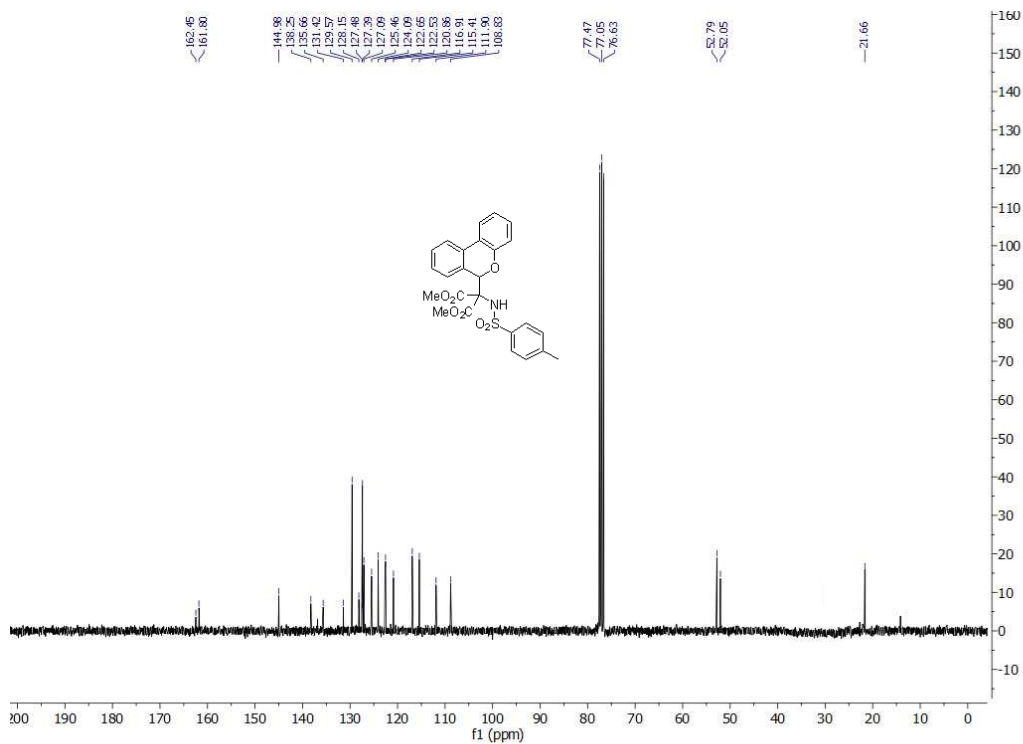

**<sup>1</sup>H NMR spectra of 8a (300 MHz, Chloroform-d):**

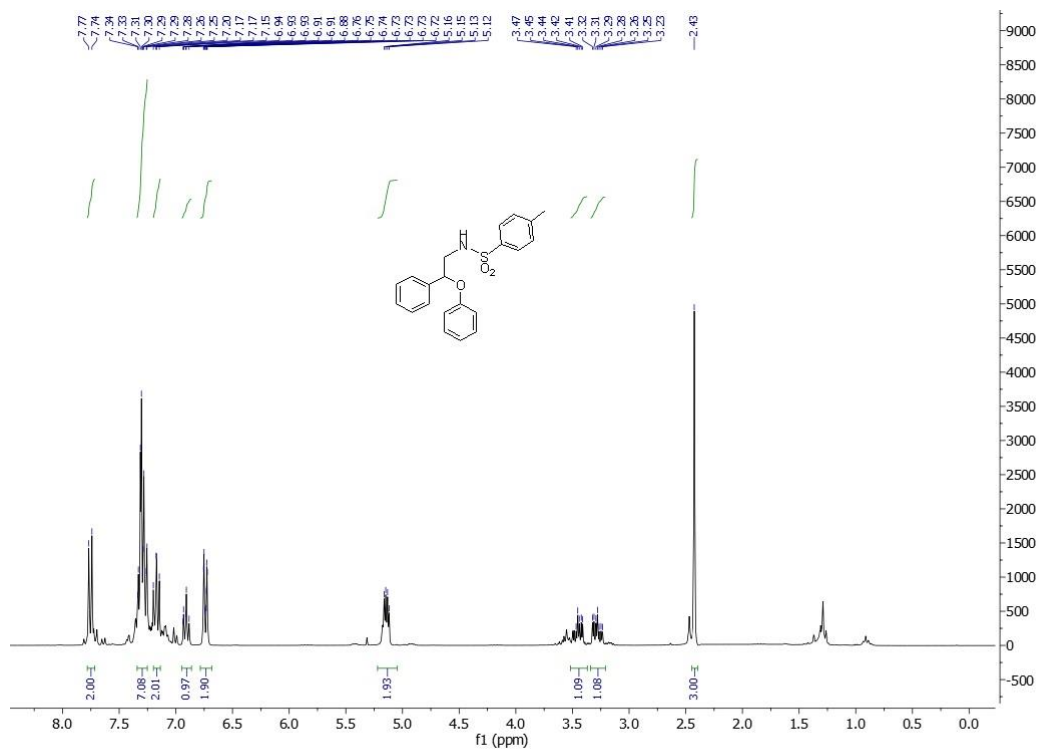

**<sup>13</sup>C {<sup>1</sup>H} NMR spectra of 8a (75 MHz, Chloroform-d):**

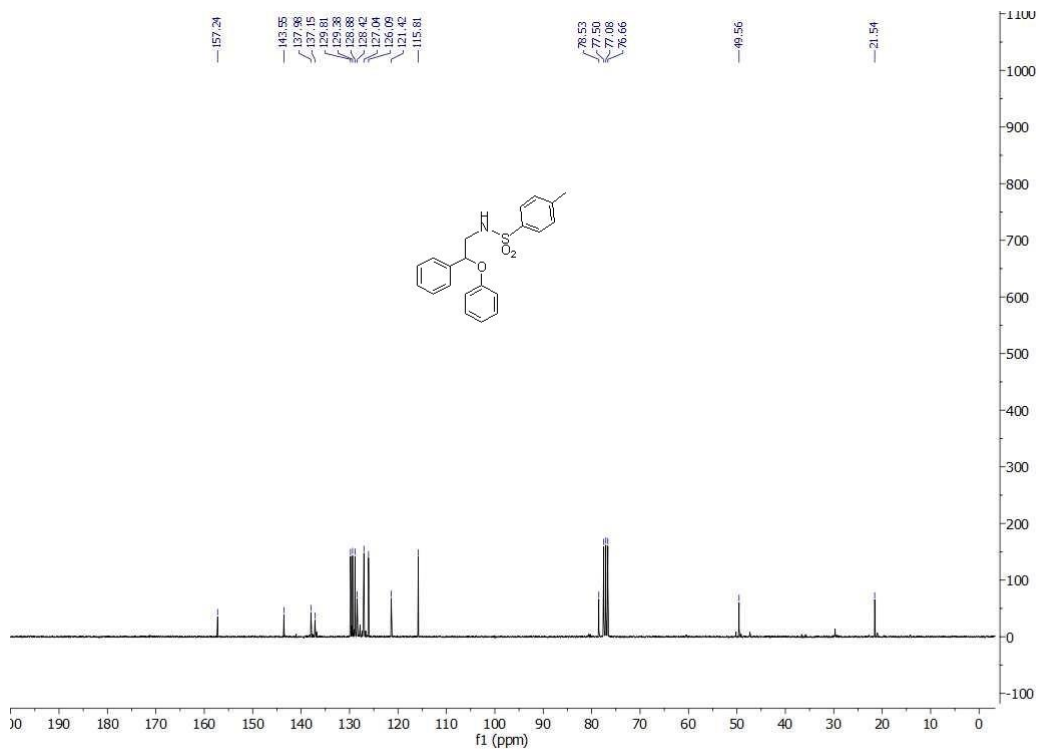

**<sup>1</sup>H NMR spectra of 8a' (400 MHz, Chloroform-d):**

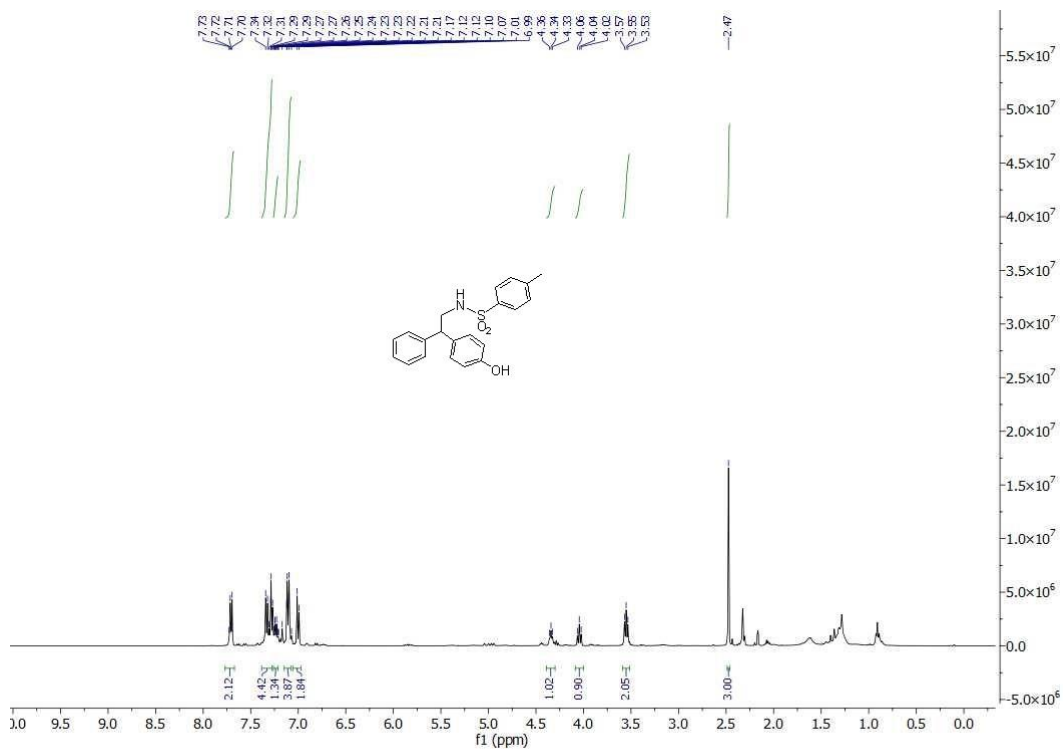

**<sup>13</sup>C {<sup>1</sup>H} NMR spectra of 8a' (100 MHz, Chloroform-d):**

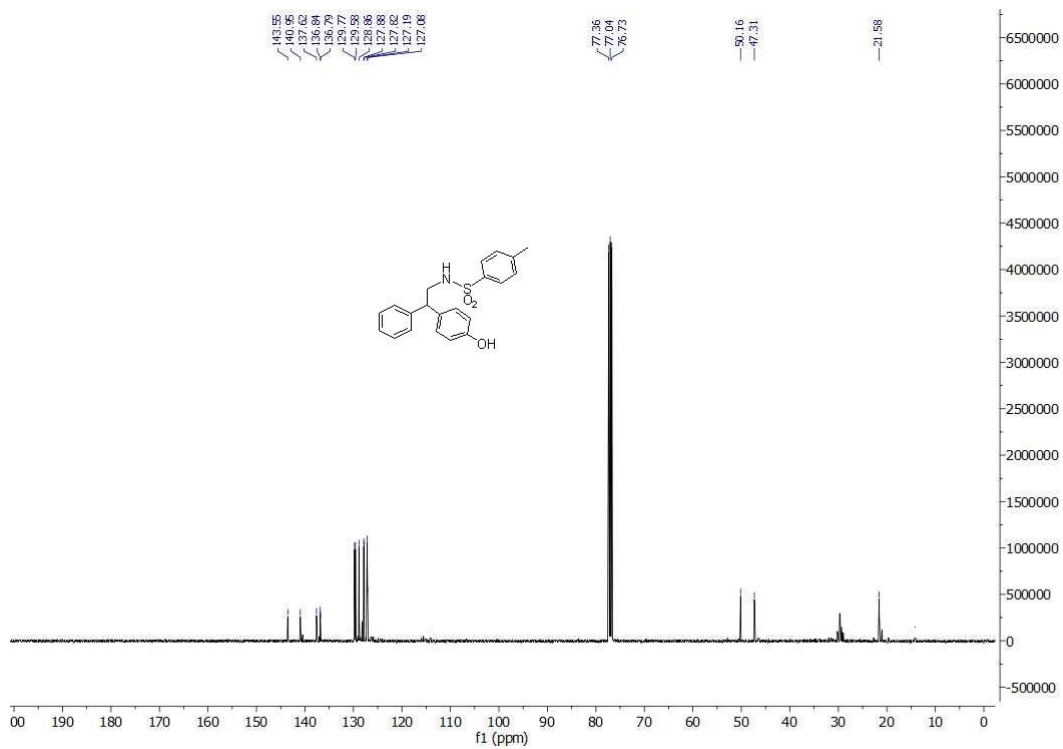

**<sup>1</sup>H NMR spectra of 8b (300 MHz, Chloroform-d):**

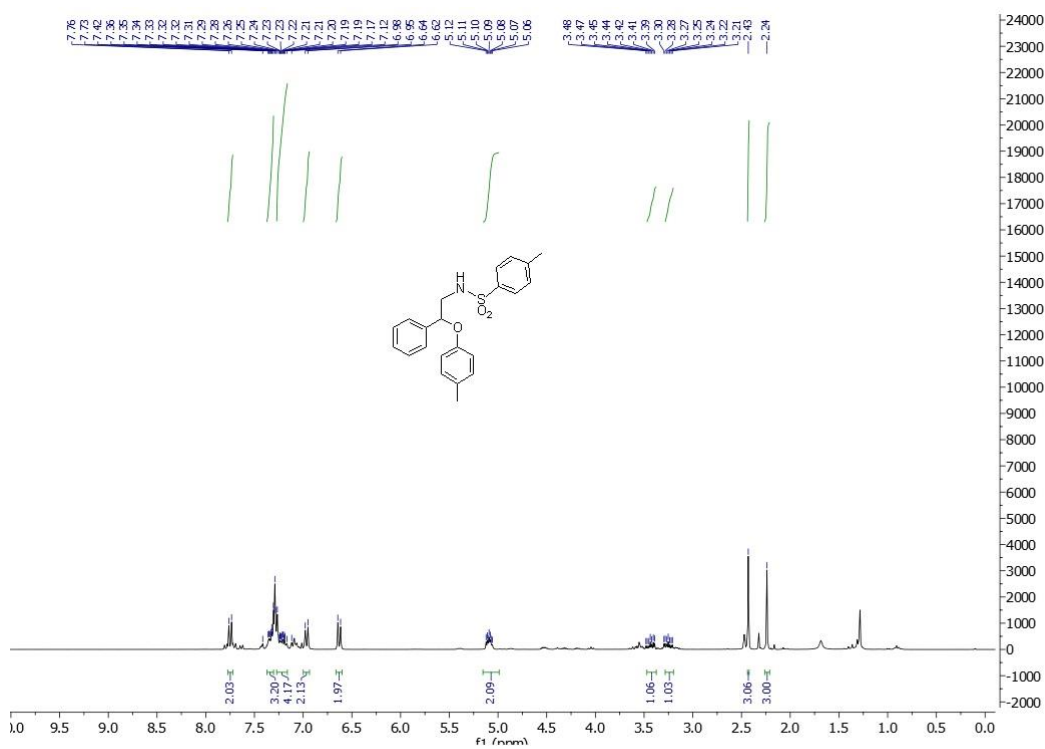

**<sup>13</sup>C {<sup>1</sup>H} NMR spectra of 8b (100 MHz, Chloroform-d):**

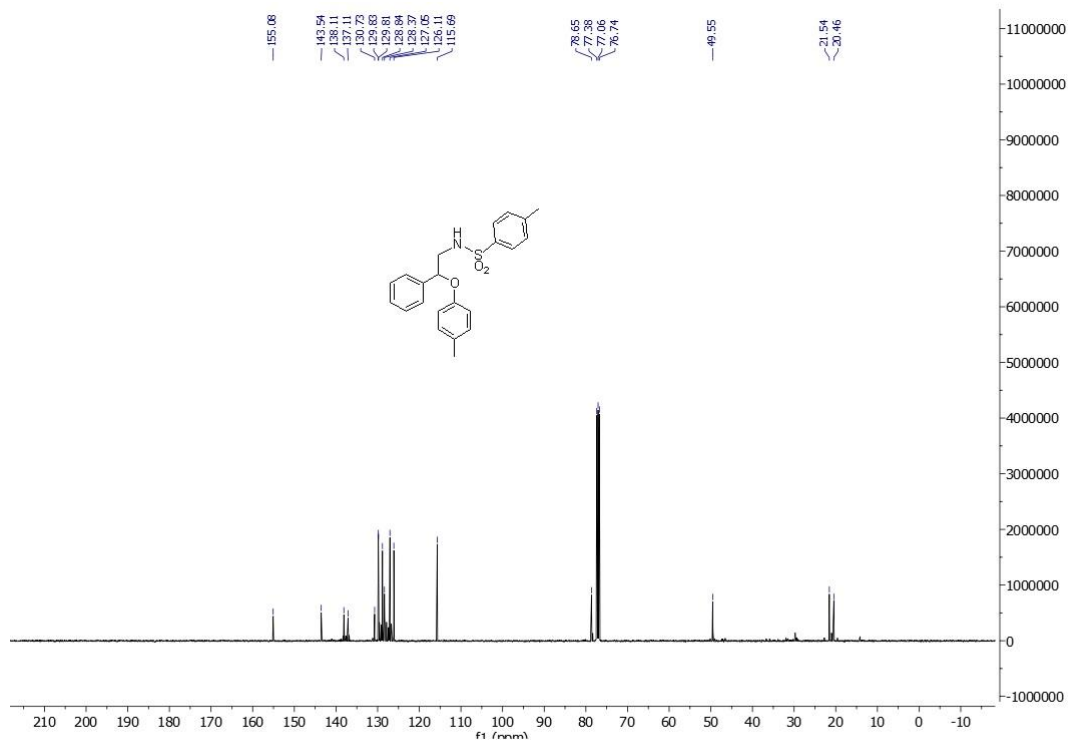

**<sup>1</sup>H NMR spectra of 8b' (300 MHz, Chloroform-d):**

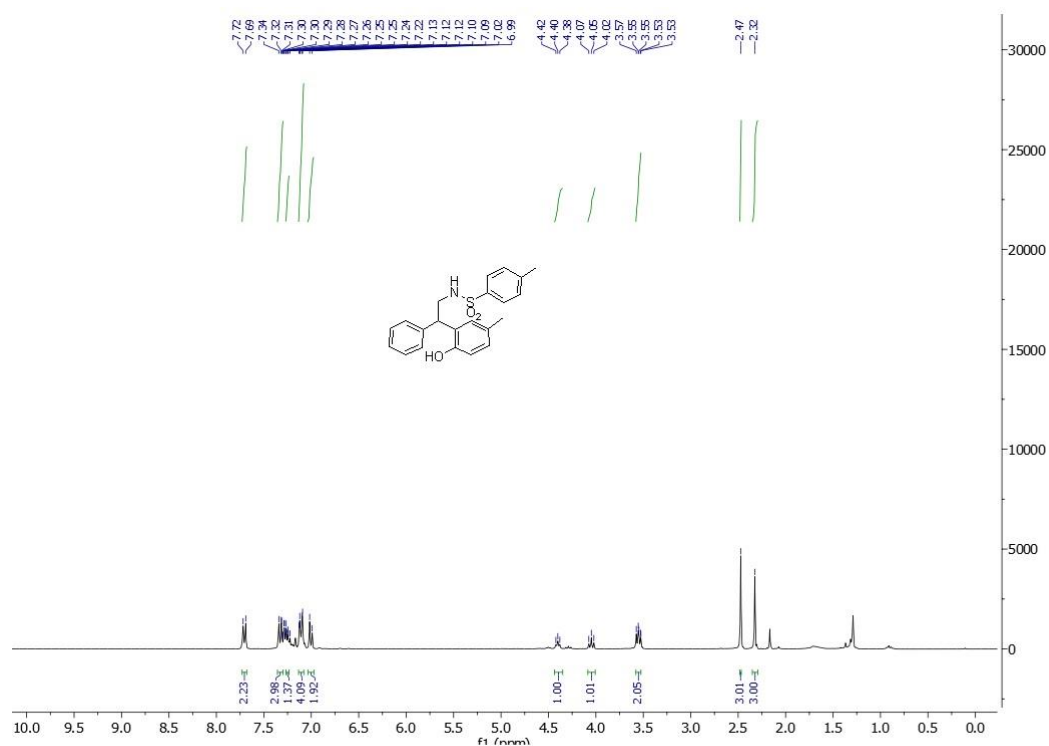

**<sup>13</sup>C {<sup>1</sup>H} NMR spectra of 8b' (100 MHz, Chloroform-d):**

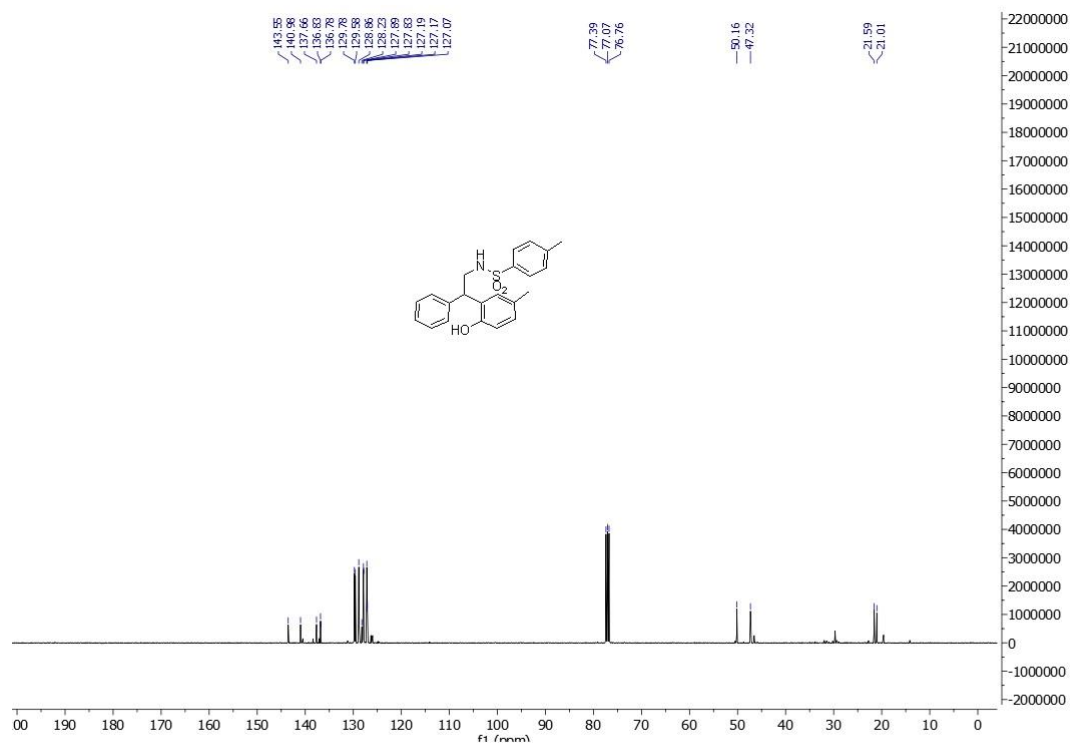

Supplement: d4ob00196f1.pdf [file d4ob00196f1.pdf]
